# Supplementary material for: Highly efficient prime editing by introducing same-sense mutations in pegRNA or stabilizing its structure
Source: PubMed Central journal article supplement (PMC8964725; doi:10.1038/s41467-022-29339-9), 2022-03-29
Supplement: 41467_2022_29339_MOESM1_ESM.pdf [file 41467_2022_29339_MOESM1_ESM.pdf]

## Supplementary figures and legends

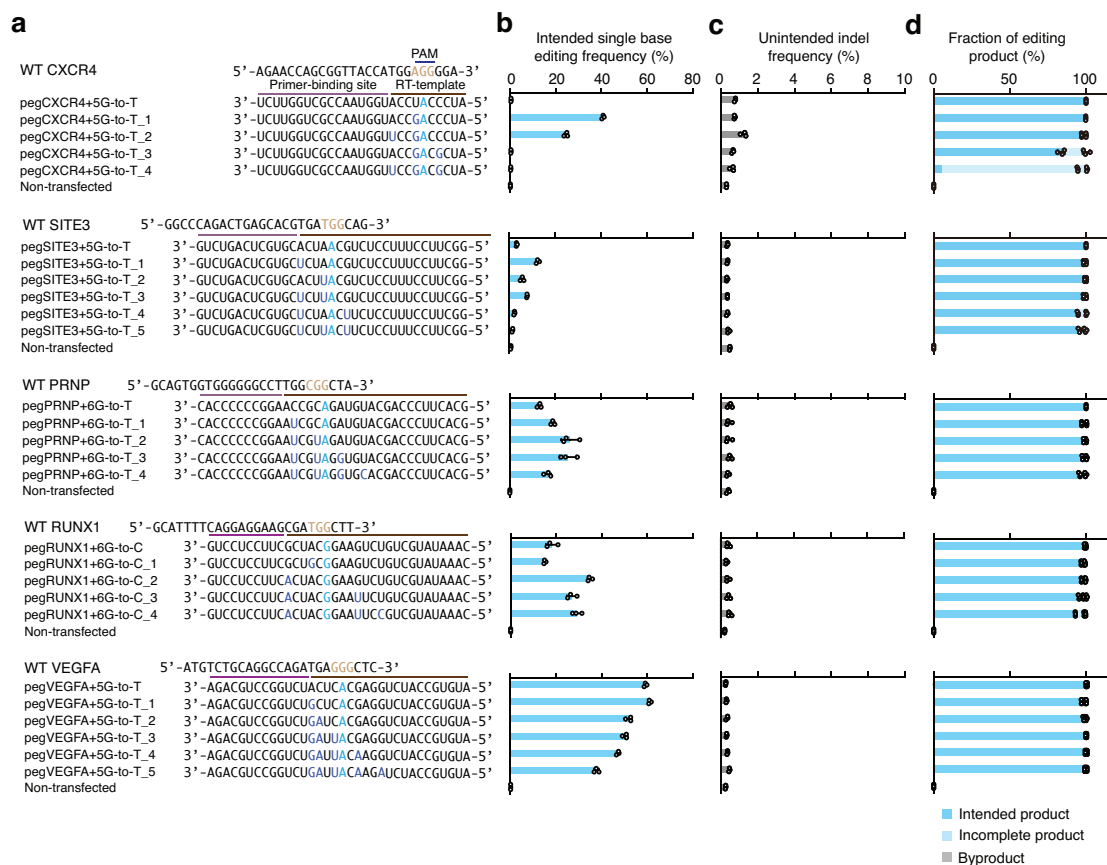

**Supplementary Fig. 1. pegRNA containing additional base substitutions induced higher editing efficiencies of single-base substitution at more target sites.**

(a) Sequences of the PBS and RTT of pegRNAs and WT on-target genomic sites.

Intended single-base edits are in cyan, additional base substitutions are in blue and PAMs are in brown. (b-d) The intended single-base editing frequencies (b),

unintended indel frequencies (c) and fractions of editing product (d) were induced by the pegRNAs in (a) at the indicated target sites under the PE3 setting. Means  $\pm$  s.d.

are from three independent experiments. Source data are provided as a Source Data

file.

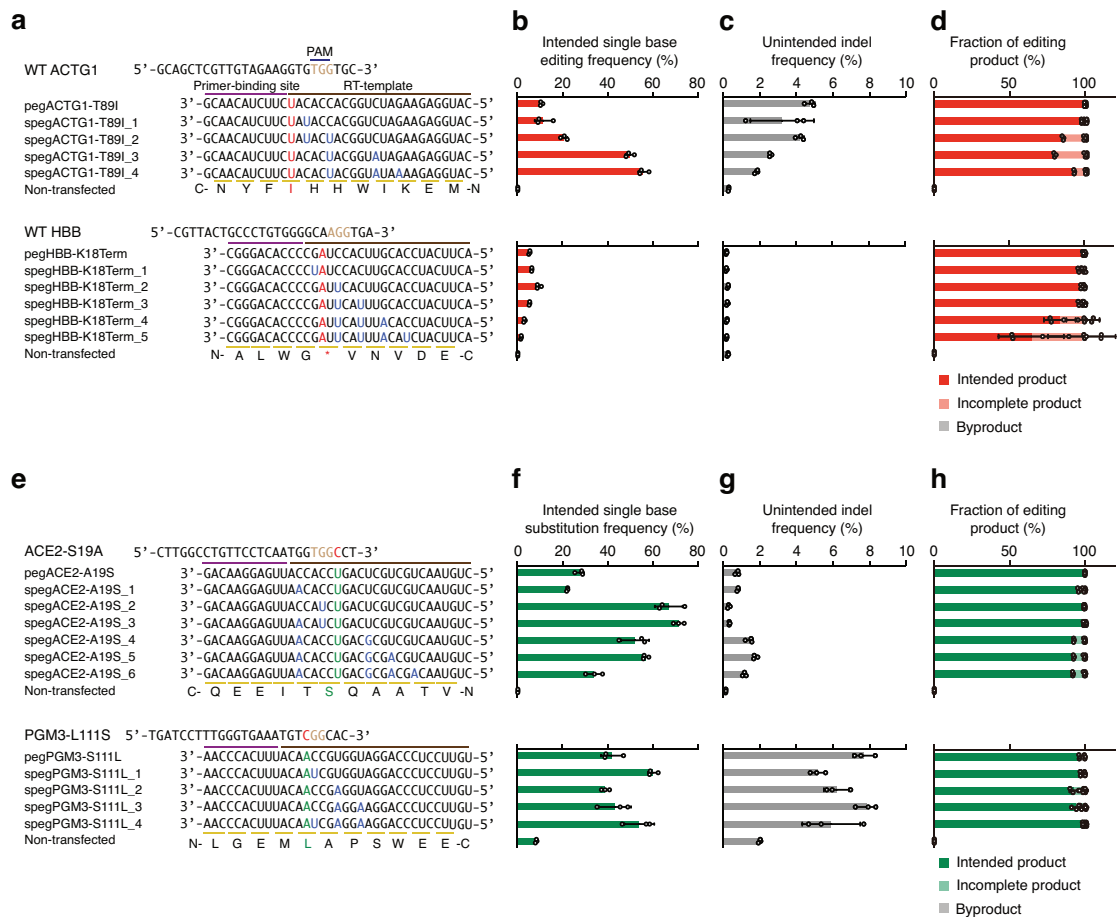

## Supplementary Fig. 2. pegRNA containing SSMs induced higher editing

**efficiencies to generate or repair pathogenic point mutations at more target sites.**

(a) Sequences of the PBS and RTT of pegRNAs and spegRNAs for generating

pathogenic point mutations and WT on-target genomic sites. Pathogenic point

mutations are in red and SSMs are in blue. (b-d) The intended single-base editing

frequencies (b), unintended indel frequencies (c) and fractions of editing product (d)

were induced by the indicated pegRNAs and spegRNAs in (a). (e) Sequences of the

PBS and RTT of pegRNAs and spegRNAs for repairing pathogenic mutations and on-

target genomic sites with pre-installed mutations. Corrected bases are in green, pre-

installed point mutations are in red and SSMs are in blue. (f-h) The intended single-

base editing frequencies (**f**), unintended indel frequencies (**g**) and fractions of editing product (**h**) were induced by the indicated pegRNAs and spegRNAs in (**e**). (**b, c, d, f, g, h**) Means  $\pm$  s.d. are from three independent experiments. Source data are provided as a Source Data file.

**a**

pegCXCR4+5G-toT-1  
 WT AGAAC CAGCGGTTACCATGGAGGGAATCAGTGTAA  
 Complete product AGAAC CAGCGGTTACCATGGAGGGAATCAGTGTAA (40.57%)  
 Intended products AGAAC CAGCGGTTACCATGGAGGGAATCAGTGTAA (0.03%)  
 Incomplete products AGAAC CAGCGGTTACCATGGAGGGAATCAGTGTAA (0.05%)

pegEMX1+4G-toC-2  
 WT CCGAGCAGAAGAAGAAAGGCTCCCATCACATCAACCGGTGGCG  
 Complete product CCGAGCAGAAGAAGAAAGGCTCCCATCACATCAACCGGTGGCG (27.50%)  
 CCGAGCAGAAGAAGAAAGGCTCCCATCACATCAACCGGTGGCG (0.01%)  
 CCGAGCAGAAGAAGAAAGGCTCCCATCACATCAACCGGTGGCG (0.01%)  
 Intended products CCGAGCAGAAGAAGAAAGGCTCCCATCACATCAACCGGTGGCG (0.06%)  
 CCGAGCAGAAGAAGAAAGGCTCCCATCACATCAACCGGTGGCG (0.15%)  
 CCGAGCAGAAGAAGAAAGGCTCCCATCACATCAACCGGTGGCG (0.06%)  
 Incomplete products CCGAGCAGAAGAAGAAAGGCTCCCATCACATCAACCGGTGGCG (0.01%)  
 CCGAGCAGAAGAAGAAAGGCTCCCATCACATCAACCGGTGGCG (0.12%)

pegSITE3+5G-toT-1  
 WT CAGACTGAGCAGTGTGGCAGAGGAAAGGAAAGCCCTGCTTCC  
 Complete product CAGACTGAGCAGTGTGGCAGAGGAAAGGAAAGCCCTGCTTCC (11.89%)  
 Intended products CAGACTGAGCAGTGTGGCAGAGGAAAGGAAAGCCCTGCTTCC (0.08%)  
 Incomplete products CAGACTGAGCAGTGTGGCAGAGGAAAGGAAAGCCCTGCTTCC (0.12%)

pegPRNP+6G-toT-2  
 WT GTGGGGGCTTGGCGCTACATGCTGGGAAGTGC  
 Complete product GTGGGGGCTTGGCGCTACATGCTGGGAAGTGC (24.83%)  
 GTGGGGGCTTGGCGCTACATGCTGGGAAGTGC (0.03%)  
 Intended products GTGGGGGCTTGGCGCTACATGCTGGGAAGTGC (0.02%)  
 GTGGGGGCTTGGCGCTACATGCTGGGAAGTGC (0.10%)  
 GTGGGGGCTTGGCGCTACATGCTGGGAAGTGC (0.17%)  
 Incomplete products GTGGGGGCTTGGCGCTACATGCTGGGAAGTGC (0.03%)  
 GTGGGGGCTTGGCGCTACATGCTGGGAAGTGC (0.02%)

pegRUNX1+6G-toC-2  
 WT CAGGAGGAAGGATGGCTCAGACAGCATATTTG  
 Complete product CAGGAGGAAGGATGGCTCAGACAGCATATTTG (24.33%)  
 Intended products CAGGAGGAAGGATGGCTCAGACAGCATATTTG (3.91%)  
 Incomplete products CAGGAGGAAGGATGGCTCAGACAGCATATTTG (0.52%)

pegVEGFA+5G-toT-1  
 WT TCTGCAGGCCAGATGAGGCTCCAGATGGCAGAT  
 Complete product TCTGCAGGCCAGATGAGGCTCCAGATGGCAGAT (57.40%)  
 Intended products TCTGCAGGCCAGATGAGGCTCCAGATGGCAGAT (1.31%)  
 Incomplete products TCTGCAGGCCAGATGAGGCTCCAGATGGCAGAT (0.47%)

**b**

pegACTG1-T891-4  
 WT CGTTGTAGAAGTGTGGTCCAGATCTTCTCATGTCGTCCCA  
 Complete product CGTTGTAGAAGTGTGGTCCAGATCTTCTCATGTCGTCCCA (45.06%)  
 CGTTGTAGAAGTGTGGTCCAGATCTTCTCATGTCGTCCCA (0.75%)  
 CGTTGTAGAAGTGTGGTCCAGATCTTCTCATGTCGTCCCA (5.24%)  
 Intended products CGTTGTAGAAGTGTGGTCCAGATCTTCTCATGTCGTCCCA (0.38%)  
 CGTTGTAGAAGTGTGGTCCAGATCTTCTCATGTCGTCCCA (0.13%)  
 CGTTGTAGAAGTGTGGTCCAGATCTTCTCATGTCGTCCCA (0.03%)  
 CGTTGTAGAAGTGTGGTCCAGATCTTCTCATGTCGTCCCA (0.57%)  
 CGTTGTAGAAGTGTGGTCCAGATCTTCTCATGTCGTCCCA (0.02%)  
 CGTTGTAGAAGTGTGGTCCAGATCTTCTCATGTCGTCCCA (0.03%)  
 Incomplete products CGTTGTAGAAGTGTGGTCCAGATCTTCTCATGTCGTCCCA (0.03%)  
 CGTTGTAGAAGTGTGGTCCAGATCTTCTCATGTCGTCCCA (0.01%)  
 CGTTGTAGAAGTGTGGTCCAGATCTTCTCATGTCGTCCCA (0.76%)  
 CGTTGTAGAAGTGTGGTCCAGATCTTCTCATGTCGTCCCA (2.61%)

pegCFTR-L23M-3  
 WT GATACAGACAGCGCTGGAAATGTGACAGATATACCAATCCC  
 Complete product GATACAGACAGCGCTGGAAATGTGACAGATATACCAATCCC (16.61%)  
 GATACAGACAGCGCTGGAAATGTGACAGATATACCAATCCC (0.02%)  
 Intended products GATACAGACAGCGCTGGAAATGTGACAGATATACCAATCCC (0.56%)  
 GATACAGACAGCGCTGGAAATGTGACAGATATACCAATCCC (0.04%)  
 Incomplete products GATACAGACAGCGCTGGAAATGTGACAGATATACCAATCCC (0.02%)  
 GATACAGACAGCGCTGGAAATGTGACAGATATACCAATCCC (4.01%)

pegHBB-K18Term-2  
 WT GCCCTGTGGGGCAAGTGAACCTGGATGAAGTTGGTGGTG  
 Complete product GCCCTGTGGGGCAAGTGAACCTGGATGAAGTTGGTGGTG (9.01%)  
 Intended products GCCCTGTGGGGCAAGTGAACCTGGATGAAGTTGGTGGTG (0.03%)  
 Incomplete products GCCCTGTGGGGCAAGTGAACCTGGATGAAGTTGGTGGTG (0.06%)

**c**

pegACE2-A19S-3  
 WT CTGTTCTCAATTGTGGCCTGAGCAGCAGTTACAGCAACAAGG  
 Complete product CTGTTCTCAATTGTGGCCTGAGCAGCAGTTACAGCAACAAGG (70.91%)  
 CTGTTCTCAATTGTGGCCTGAGCAGCAGTTACAGCAACAAGG (0.21%)  
 Intended products CTGTTCTCAATTGTGGCCTGAGCAGCAGTTACAGCAACAAGG (0.05%)  
 CTGTTCTCAATTGTGGCCTGAGCAGCAGTTACAGCAACAAGG (0.37%)  
 Incomplete products CTGTTCTCAATTGTGGCCTGAGCAGCAGTTACAGCAACAAGG (0.06%)  
 CTGTTCTCAATTGTGGCCTGAGCAGCAGTTACAGCAACAAGG (0.02%)

pegHBB-V7E-2  
 WT CACCTGACTCCTGTGAGAAAGTCTGCCGTACTGCCCTGTGGG  
 Complete product CACCTGACTCCTGTGAGAAAGTCTGCCGTACTGCCCTGTGGG (39.22%)  
 CACCTGACTCCTGTGAGAAAGTCTGCCGTACTGCCCTGTGGG (0.11%)  
 Intended products CACCTGACTCCTGTGAGAAAGTCTGCCGTACTGCCCTGTGGG (0.01%)  
 CACCTGACTCCTGTGAGAAAGTCTGCCGTACTGCCCTGTGGG (0.05%)  
 Incomplete products CACCTGACTCCTGTGAGAAAGTCTGCCGTACTGCCCTGTGGG (0.01%)  
 CACCTGACTCCTGTGAGAAAGTCTGCCGTACTGCCCTGTGGG (0.04%)  
 CACCTGACTCCTGTGAGAAAGTCTGCCGTACTGCCCTGTGGG (0.01%)

pegPGM3-S111L-1  
 WT TTGGGTGAAATGTGGCACCATCTGGGAGGAACATGCCACCT  
 Complete product TTGGGTGAAATGTGGCACCATCTGGGAGGAACATGCCACCT (46.39%)  
 Intended products TTGGGTGAAATGTGGCACCATCTGGGAGGAACATGCCACCT (6.80%)  
 Incomplete products TTGGGTGAAATGTGGCACCATCTGGGAGGAACATGCCACCT (0.09%)

### Supplementary Fig. 3. Incomplete products induced by the pegRNAs containing additional base substitutions at on-target sites.

(a) The frequencies of complete products (with intended single-base editing and all additional base substitutions), intended products (with intended single-base editing but not all additional base substitutions) and incomplete products (with additional base substitutions but no intended single-base editing) induced by the optimized

pegRNAs with additional base substitutions in Fig. **1a** and Supplementary Fig. **1a. (b)**

The frequencies of complete products (with intended single-base editing and all SSMs), intended products (with intended single-base editing but not all SSMs) and incomplete products (with SSMs but no intended single-base editing) induced by the optimized spegRNAs in Fig. **1a** and Supplementary Fig. **2a. (c)** The frequencies of complete products (with intended single-base editing and all SSMs), intended products (with intended single-base editing but not all SSMs) and incomplete products (with SSMs but no intended single-base editing) induced by the optimized spegRNAs in Fig. **1a** and Supplementary Fig. **2e**. The frequencies are means from three biologically independent experiments.

**a**

■ RT-template ■ Scaffold insertion

|                           |                                                      |
|---------------------------|------------------------------------------------------|
| <b>pegCXCR4+5G-to-T</b>   |                                                      |
| WT                        | AGAACACCGGTTACCATGGAGGGATCAGTGTAA                    |
| Complete product          | AGAACACCGGTTACCATGGAGGGATCAGTGTAA (0.0329%)          |
| <b>pegCXCR4+5G-to-T_1</b> |                                                      |
| WT                        | AGAACACCGGTTACCATGGAGGGATCAGTGTAA                    |
| Complete product          | AGAACACCGGTTACCATGGAGGGATCAGTGTAA (40.57%)           |
| Byproducts                | AGAACACCGGTTACCATGGAGGGATCAGTGTAA (0.0213%)          |
|                           | AGAACACCGGTTACCATGGAGGGATCAGTGTAA (0.0137%)          |
|                           | AGAACACCGGTTACCATGGAGGGATCAGTGTAA (0.0001%)          |
| <b>pegEMX1+4G-to-C</b>    |                                                      |
| WT                        | CCGAGCAGAAGAAGAGGCTCCCATCACATCAACCGTGGCG             |
| Complete product          | CCGAGCAGAAGAAGAGGCTCCCATCACATCAACCGTGGCG (2.56%)     |
| Byproducts                | CCGAGCAGAAGAAGAGGCTCCCATCACATCAACCGTGGCG (0.0812%)   |
| <b>pegEMX1+4G-to-C_2</b>  |                                                      |
| WT                        | CCGAGCAGAAGAAGAGGCTCCCATCACATCAACCGTGGCG             |
| Complete product          | CCGAGCAGAAGAAGAGGCTCCCATCACATCAACCGTGGCG (27.50%)    |
| Byproducts                | CCGAGCAGAAGAAGAGGCTCCCATCACATCAACCGTGGCG (0.905%)    |
|                           | CCGAGCAGAAGAAGAGGCTCCCATCACATCAACCGTGGCG (0.0284%)   |
|                           | CCGAGCAGAAGAAGAGGCTCCCATCACATCAACCGTGGCG (0.0028%)   |
|                           | CCGAGCAGAAGAAGAGGCTCCCATCACATCAACCGTGGCG (0.0002%)   |
| <b>pegSITE3+5G-to-T</b>   |                                                      |
| WT                        | CAGACTGACGACGTGAGCCAGAGAAAGAAAGCCCTGCTTCC            |
| Complete product          | CAGACTGACGACGTGAGCCAGAGAAAGAAAGCCCTGCTTCC (3.20%)    |
| Byproducts                | CAGACTGACGACGTGAGCCAGAGAAAGAAAGCCCTGCTTCC (0.00017%) |
| <b>pegSITE3+5G-to-T_1</b> |                                                      |
| WT                        | CAGACTGACGACGTGAGCCAGAGAAAGAAAGCCCTGCTTCC            |
| Complete product          | CAGACTGACGACGTGAGCCAGAGAAAGAAAGCCCTGCTTCC (11.69%)   |
| Byproducts                | CAGACTGACGACGTGAGCCAGAGAAAGAAAGCCCTGCTTCC (0.001%)   |
| <b>pegPRNP+6G-to-T</b>    |                                                      |
| WT                        | GTGGGGGCGCTTGGCGCTACATGCTGGGAAGTGCATGAGCA            |
| Complete product          | GTGGGGGCGCTTGGCGCTACATGCTGGGAAGTGCATGAGCA (11.73%)   |
| Byproducts                | GTGGGGGCGCTTGGCGCTACATGCTGGGAAGTGCATGAGCA (0.0028%)  |
| <b>pegPRNP+6G-to-T_2</b>  |                                                      |
| WT                        | GTGGGGGCGCTTGGCGCTACATGCTGGGAAGTGCATGAGCA            |
| Complete product          | GTGGGGGCGCTTGGCGCTACATGCTGGGAAGTGCATGAGCA (24.83%)   |
| Byproducts                | GTGGGGGCGCTTGGCGCTACATGCTGGGAAGTGCATGAGCA (0.0027%)  |
| <b>pegRUNX1+6G-to-C</b>   |                                                      |
| WT                        | CAGAGGAAGCGATGCTTCAGACAGCATATTGAGTCATTT              |
| Complete product          | CAGAGGAAGCGATGCTTCAGACAGCATATTGAGTCATTT (16.65%)     |
| Byproducts                | CAGAGGAAGCGATGCTTCAGACAGCATATTGAGTCATTT (0.1107%)    |
| <b>pegRUNX1+6G-to-C_2</b> |                                                      |
| WT                        | CAGAGGAAGCGATGCTTCAGACAGCATATTGAGTCATTT              |
| Complete product          | CAGAGGAAGCGATGCTTCAGACAGCATATTGAGTCATTT (14.91%)     |
| Byproducts                | CAGAGGAAGCGATGCTTCAGACAGCATATTGAGTCATTT (0.2096%)    |
|                           | CAGAGGAAGCGATGCTTCAGACAGCATATTGAGTCATTT (0.0472%)    |
|                           | CAGAGGAAGCGATGCTTCAGACAGCATATTGAGTCATTT (0.0027%)    |
|                           | CAGAGGAAGCGATGCTTCAGACAGCATATTGAGTCATTT (0.0024%)    |
| <b>pegVEGFA+5G-to-T</b>   |                                                      |
| WT                        | TCTGAGCCAGATGAGGCTCCAGATGGACATTTGTAGAG               |
| Complete product          | TCTGAGCCAGATGAGGCTCCAGATGGACATTTGTAGAG (58.13%)      |
| Byproducts                | TCTGAGCCAGATGAGGCTCCAGATGGACATTTGTAGAG (0.0219%)     |
|                           | TCTGAGCCAGATGAGGCTCCAGATGGACATTTGTAGAG (0.0045%)     |
| <b>pegVEGFA+5G-to-T_1</b> |                                                      |
| WT                        | TCTGAGCCAGATGAGGCTCCAGATGGACATTTGTAGAG               |
| Complete product          | TCTGAGCCAGATGAGGCTCCAGATGGACATTTGTAGAG (57.40%)      |
| Byproducts                | TCTGAGCCAGATGAGGCTCCAGATGGACATTTGTAGAG (0.0208%)     |
|                           | TCTGAGCCAGATGAGGCTCCAGATGGACATTTGTAGAG (0.0004%)     |
|                           | TCTGAGCCAGATGAGGCTCCAGATGGACATTTGTAGAG (0.0003%)     |
|                           | TCTGAGCCAGATGAGGCTCCAGATGGACATTTGTAGAG (0.0001%)     |
|                           | TCTGAGCCAGATGAGGCTCCAGATGGACATTTGTAGAG (0.0001%)     |

**b**

|                          |                                                    |
|--------------------------|----------------------------------------------------|
| <b>pegACTG1-T89I</b>     |                                                    |
| WT                       | CGTTGTAGAAGGTGGTGCAGATCTTCTCCATGCTGCCA             |
| Complete product         | CGTTGTAGAAGGTGGTGCAGATCTTCTCCATGCTGCCA (8.43%)     |
| Byproducts               | CGTTGTAGAAGGTGGTGCAGATCTTCTCCATGCTGCCA (0.0546%)   |
|                          | CGTTGTAGAAGGTGGTGCAGATCTTCTCCATGCTGCCA (0.0034%)   |
|                          | CGTTGTAGAAGGTGGTGCAGATCTTCTCCATGCTGCCA (0.0003%)   |
| <b>spegACTG1-T89I_4</b>  |                                                    |
| WT                       | CGTTGTAGAAGGTGGTGCAGATCTTCTCCATGCTGCCA             |
| Complete product         | CGTTGTAGAAGGTGGTGCAGATCTTCTCCATGCTGCCA (45.06%)    |
| Byproducts               | CGTTGTAGAAGGTGGTGCAGATCTTCTCCATGCTGCCA (0.0455%)   |
|                          | CGTTGTAGAAGGTGGTGCAGATCTTCTCCATGCTGCCA (0.0022%)   |
|                          | CGTTGTAGAAGGTGGTGCAGATCTTCTCCATGCTGCCA (0.0072%)   |
|                          | CGTTGTAGAAGGTGGTGCAGATCTTCTCCATGCTGCCA (0.0059%)   |
|                          | CGTTGTAGAAGGTGGTGCAGATCTTCTCCATGCTGCCA (0.0044%)   |
|                          | CGTTGTAGAAGGTGGTGCAGATCTTCTCCATGCTGCCA (0.0029%)   |
|                          | CGTTGTAGAAGGTGGTGCAGATCTTCTCCATGCTGCCA (0.0013%)   |
|                          | CGTTGTAGAAGGTGGTGCAGATCTTCTCCATGCTGCCA (0.001%)    |
|                          | CGTTGTAGAAGGTGGTGCAGATCTTCTCCATGCTGCCA (0.0007%)   |
|                          | CGTTGTAGAAGGTGGTGCAGATCTTCTCCATGCTGCCA (0.0008%)   |
|                          | CGTTGTAGAAGGTGGTGCAGATCTTCTCCATGCTGCCA (0.0002%)   |
|                          | CGTTGTAGAAGGTGGTGCAGATCTTCTCCATGCTGCCA (0.0002%)   |
| <b>pegCFTR-L23M</b>      |                                                    |
| WT                       | GATACAGACAGCGCCGTAATTTGACACATATACCAATCCC           |
| Complete product         | GATACAGACAGCGCCGTAATTTGACACATATACCAATCCC (2.24%)   |
| Byproducts               | GATACAGACAGCGCCGTAATTTGACACATATACCAATCCC (0.104%)  |
| <b>spegCFTR-L23M_3</b>   |                                                    |
| WT                       | GATACAGACAGCGCCGTAATTTGACACATATACCAATCCC           |
| Complete product         | GATACAGACAGCGCCGTAATTTGACACATATACCAATCCC (16.61%)  |
| Byproducts               | GATACAGACAGCGCCGTAATTTGACACATATACCAATCCC (3.798%)  |
|                          | GATACAGACAGCGCCGTAATTTGACACATATACCAATCCC (0.1479%) |
|                          | GATACAGACAGCGCCGTAATTTGACACATATACCAATCCC (0.0128%) |
|                          | GATACAGACAGCGCCGTAATTTGACACATATACCAATCCC (0.003%)  |
| <b>pegHBB-K18Term</b>    |                                                    |
| WT                       | GCCCTGTGGGGCAGTGAACGTGGATGAAGTTGGTGGT              |
| Complete product         | GCCCTGTGGGGCAGTGAACGTGGATGAAGTTGGTGGT (5.01%)      |
| Byproducts               | GCCCTGTGGGGCAGTGAACGTGGATGAAGTTGGTGGT (0.198%)     |
|                          | GCCCTGTGGGGCAGTGAACGTGGATGAAGTTGGTGGT (0.0069%)    |
| <b>spegHBB-K18Term_2</b> |                                                    |
| WT                       | GCCCTGTGGGGCAGTGAACGTGGATGAAGTTGGTGGT              |
| Complete product         | GCCCTGTGGGGCAGTGAACGTGGATGAAGTTGGTGGT (9.01%)      |
| Byproducts               | GCCCTGTGGGGCAGTGAACGTGGATGAAGTTGGTGGT (0.0498%)    |
|                          | GCCCTGTGGGGCAGTGAACGTGGATGAAGTTGGTGGT (0.0005%)    |
| <b>pegHBB-V7E</b>        |                                                    |
| WT                       | CACCTGACTCTGTGGAGAGTCTGCCGTTACTGCCCTGTGG           |
| Complete product         | CACCTGACTCTGTGGAGAGTCTGCCGTTACTGCCCTGTGG (12.20%)  |
| Byproducts               | CACCTGACTCTGTGGAGAGTCTGCCGTTACTGCCCTGTGG (0.1258%) |
|                          | CACCTGACTCTGTGGAGAGTCTGCCGTTACTGCCCTGTGG (0.0014%) |
| <b>spegHBB-V7E_2</b>     |                                                    |
| WT                       | CACCTGACTCTGTGGAGAGTCTGCCGTTACTGCCCTGTGG           |
| Complete product         | CACCTGACTCTGTGGAGAGTCTGCCGTTACTGCCCTGTGG (39.22%)  |
| Byproducts               | CACCTGACTCTGTGGAGAGTCTGCCGTTACTGCCCTGTGG (0.086%)  |
|                          | CACCTGACTCTGTGGAGAGTCTGCCGTTACTGCCCTGTGG (0.0008%) |
|                          | CACCTGACTCTGTGGAGAGTCTGCCGTTACTGCCCTGTGG (0.0003%) |
|                          | CACCTGACTCTGTGGAGAGTCTGCCGTTACTGCCCTGTGG (0.0002%) |
|                          | CACCTGACTCTGTGGAGAGTCTGCCGTTACTGCCCTGTGG (0.0002%) |

**c**

|                         |                                                     |
|-------------------------|-----------------------------------------------------|
| <b>pegACE2-A19S</b>     |                                                     |
| WT                      | CTGTTCTCAATGTTGACTGAGCAGCAGTTACAGCAACAGG            |
| Complete product        | CTGTTCTCAATGTTGACTGAGCAGCAGTTACAGCAACAGG (25.28%)   |
| Byproducts              | CTGTTCTCAATGTTGACTGAGCAGCAGTTACAGCAACAGG (0.0802%)  |
|                         | CTGTTCTCAATGTTGACTGAGCAGCAGTTACAGCAACAGG (0.0093%)  |
| <b>spegACE2-A19S_3</b>  |                                                     |
| WT                      | CTGTTCTCAATGTTGACTGAGCAGCAGTTACAGCAACAGG            |
| Complete product        | CTGTTCTCAATGTTGACTGAGCAGCAGTTACAGCAACAGG (70.91%)   |
| Byproducts              | CTGTTCTCAATGTTGACTGAGCAGCAGTTACAGCAACAGG (0.0833%)  |
|                         | CTGTTCTCAATGTTGACTGAGCAGCAGTTACAGCAACAGG (0.0099%)  |
|                         | CTGTTCTCAATGTTGACTGAGCAGCAGTTACAGCAACAGG (0.0021%)  |
| <b>pegPGM3-S111L</b>    |                                                     |
| WT                      | TGGGTGAAATGTTGGCACCCTCTGGGAGGAACATGCCACCT           |
| Complete product        | TGGGTGAAATGTTGGCACCCTCTGGGAGGAACATGCCACCT (27.57%)  |
| Byproducts              | TGGGTGAAATGTTGGCACCCTCTGGGAGGAACATGCCACCT (1.728%)  |
|                         | TGGGTGAAATGTTGGCACCCTCTGGGAGGAACATGCCACCT (0.044%)  |
| <b>spegPGM3-S111L_1</b> |                                                     |
| WT                      | TGGGTGAAATGTTGGCACCCTCTGGGAGGAACATGCCACCT           |
| Complete product        | TGGGTGAAATGTTGGCACCCTCTGGGAGGAACATGCCACCT (46.39%)  |
| Byproducts              | TGGGTGAAATGTTGGCACCCTCTGGGAGGAACATGCCACCT (1.495%)  |
|                         | TGGGTGAAATGTTGGCACCCTCTGGGAGGAACATGCCACCT (0.1751%) |
|                         | TGGGTGAAATGTTGGCACCCTCTGGGAGGAACATGCCACCT (0.1724%) |
|                         | TGGGTGAAATGTTGGCACCCTCTGGGAGGAACATGCCACCT (0.0049%) |
|                         | TGGGTGAAATGTTGGCACCCTCTGGGAGGAACATGCCACCT (0.0014%) |
|                         | TGGGTGAAATGTTGGCACCCTCTGGGAGGAACATGCCACCT (0.0011%) |

## Supplementary Fig. 4. Byproducts induced by the pegRNAs containing additional base substitutions at on-target sites.

(a) The frequencies of complete products and byproducts (with pegRNA scaffold incorporation) induced by regular pegRNAs and the optimized pegRNAs containing

additional base substitutions in Fig. **1a** and Supplementary Fig. **1a**. **(b)** The frequencies of complete products and byproducts induced by regular pegRNAs and the optimized spegRNAs in Fig. **1a** and Supplementary Fig. **2a**. **(c)** The frequencies of complete products and byproducts induced by regular pegRNAs and the optimized spegRNAs in Fig. **1a** and Supplementary Fig. **2e**. The frequencies are means from three biologically independent experiments.

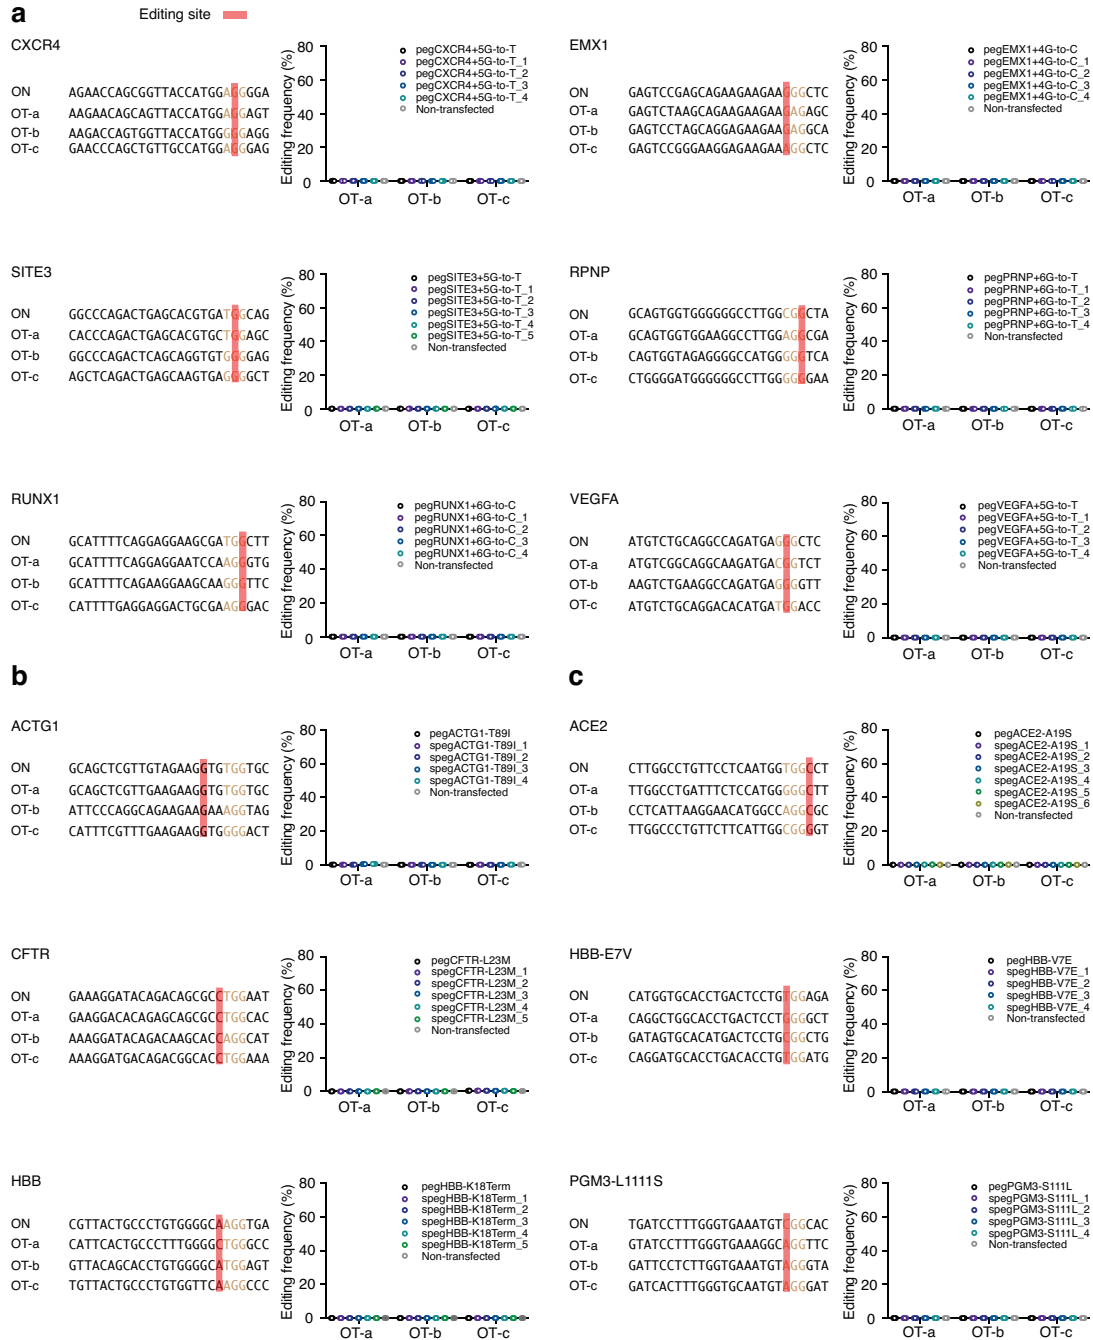

**Supplementary Fig. 5. Off-target editing induced by the pegRNAs containing additional base substitutions.**

(a) The sequences of on- and off-target sites for the pegRNAs in Fig. 1a and Supplementary Fig. 1a are shown. The base substitution frequencies were determined at the indicated off-target sites. (b) The sequences of on- and off-target sites for the



pegRNAs in Fig. **1a** and Supplementary Fig. **2a** are shown. The base substitution frequencies were determined at the indicated off-target sites. (c) The sequences of on- and off-target sites for the pegRNAs in Fig. **1a** and Supplementary Fig. **2e** are shown. The base substitution frequencies were determined at the indicated off-target sites. Means  $\pm$  s.d. are from three independent experiments. Source data are provided as a Source Data file.

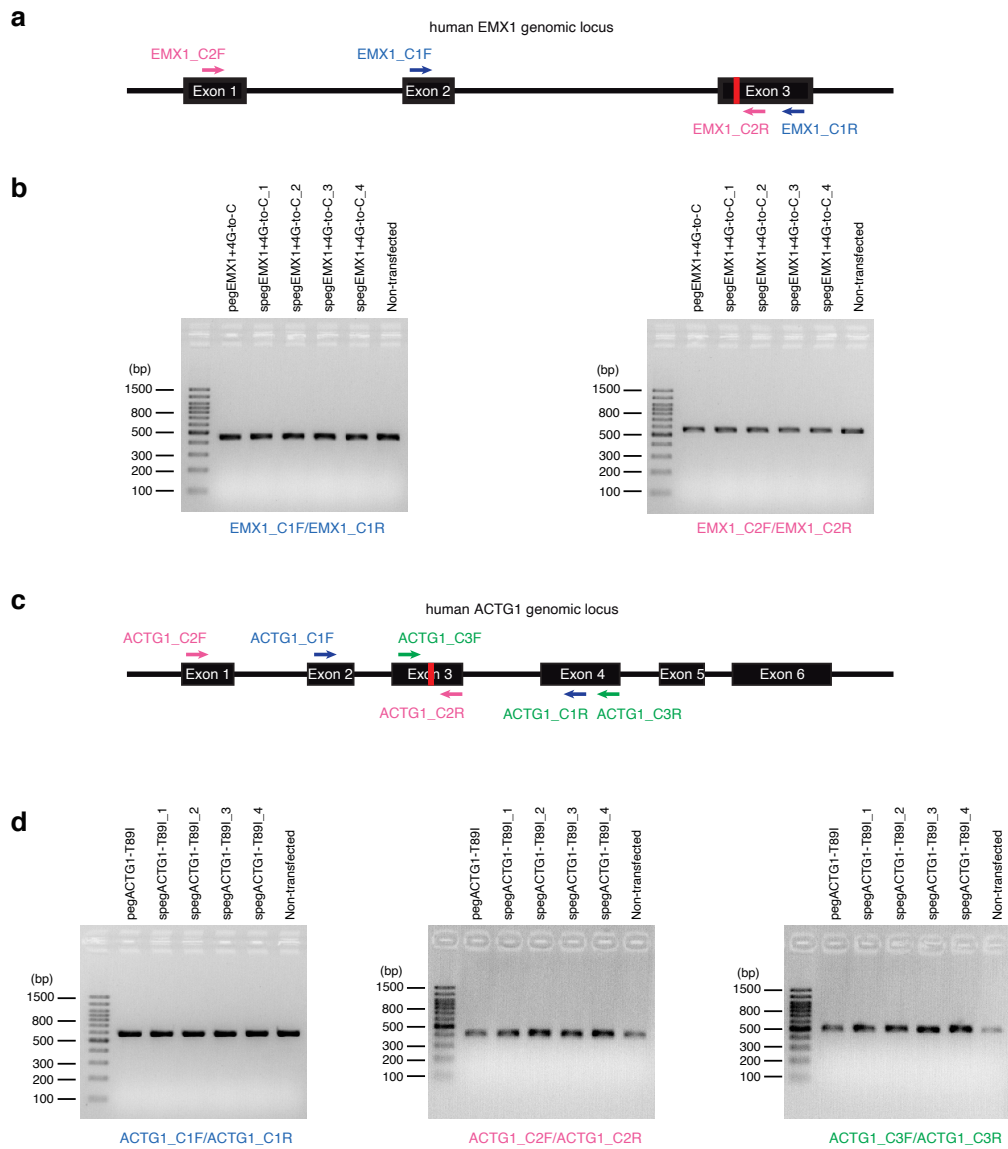

**Supplementary Fig. 6. Splicing patterns of the exons edited by the pegRNAs containing additional base substitutions.**

(a) Schematic diagrams illustrating the position of PCR primers to detect the splicing pattern of the edited exon 3 of *EMX1*. (b) RT-PCR results showed that no aberrant splicing of *EMX1* exon 3 was triggered by the indicated pegRNAs. (c) Schematic diagrams illustrating the position of PCR primers to detect the splicing pattern of the edited exon 3 of *ACGT1*. (d) RT-PCR results showed that no aberrant splicing of

*ACGTI* exon 3 was triggered by the indicated pegRNAs. Agarose gel data are representative of three independent experiments. Uncropped gels for **(b)** and **(d)** are provided.

## U2OS

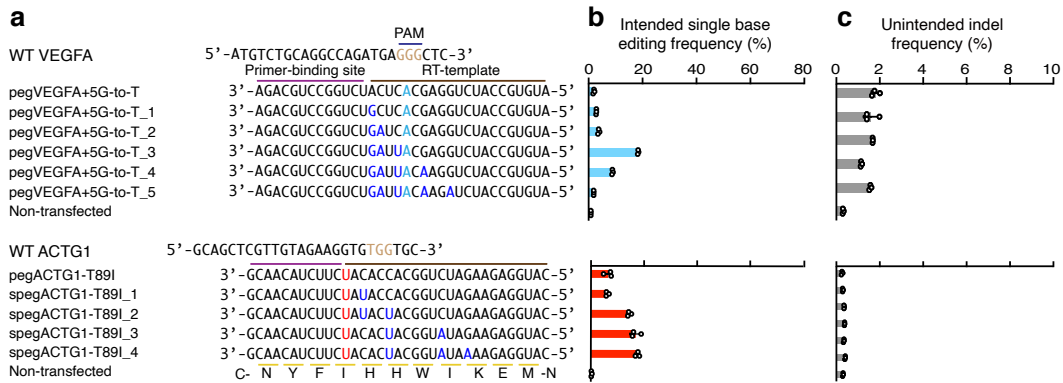

## HeLa

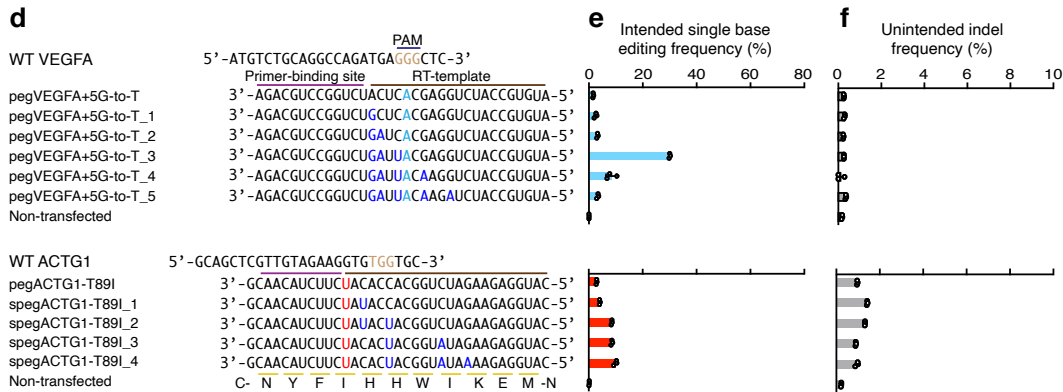

## HeLa\_mutation correction

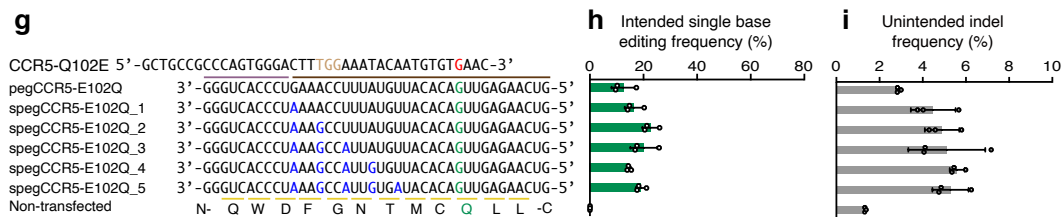

**Supplementary Fig. 7. The pegRNA containing additional base substitutions or SSMs induced higher single-base editing efficiencies in different cells.**

(a) Sequences of the PBS and RTT of pegRNAs and spegRNAs and WT on-target genomic site in U2OS cells. Intended single-base edits are in cyan, pathogenic point mutations are in red and additional base substitutions and SSMs are in blue. (b, c) The

intended single-base editing frequencies (**b**) and unintended indel frequencies (**c**) were induced by the indicated pegRNAs and spegRNAs in (**a**) in U2OS cells. (**d**) Sequences of the PBS and RTT of pegRNAs and spegRNAs and WT on-target genomic site in HeLa cells. Intended single-base edits are in cyan, pathogenic point mutations are in red and additional base substitutions and SSMs are in blue. (**e, f**) The intended single-base editing frequencies (**e**) and unintended indel frequencies (**f**) were induced by the indicated pegRNAs and spegRNAs in (**d**) in HeLa cells. (**g**) Sequences of the PBS and RTT of spegRNAs and on-target genomic site in the HeLa cells with a pre-installed point mutation. Corrected bases are in green, pre-installed point mutations are in red and SSMs are in blue. (**h, i**) The intended single-base editing frequencies (**h**) and unintended indel frequencies (**i**) were induced by the indicated pegRNAs in (**g**) in the HeLa cells with the pre-installed point mutation. (**b, c, e, f, h, i**) Means  $\pm$  s.d. are from three independent experiments. Source data are provided as a Source Data file.

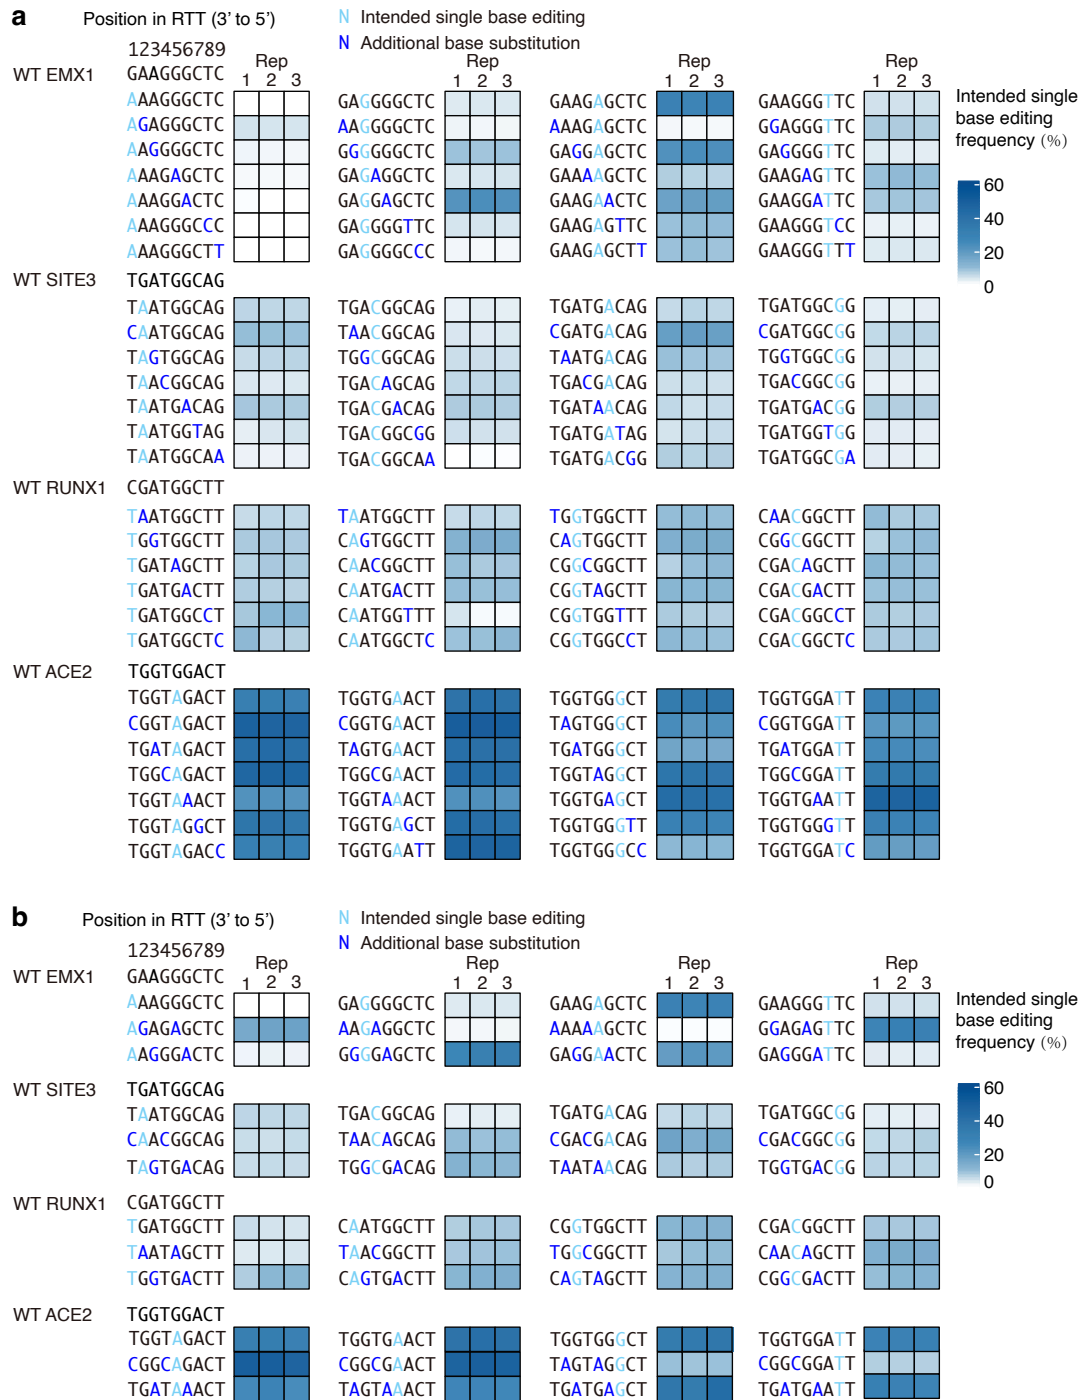

**Supplementary Fig. 8. Effect of additional base substitution position in RTT on editing efficiency.**

(a) Heatmaps show the intended single-base editing frequencies induced by the pegRNAs containing one additional base substitution at the indicated positions in

RTT. **(b)** Heatmaps show the intended single-base editing frequencies induced by the pegRNAs containing two additional base substitution at the indicated positions in RTT. Source data are provided as a Source Data file.

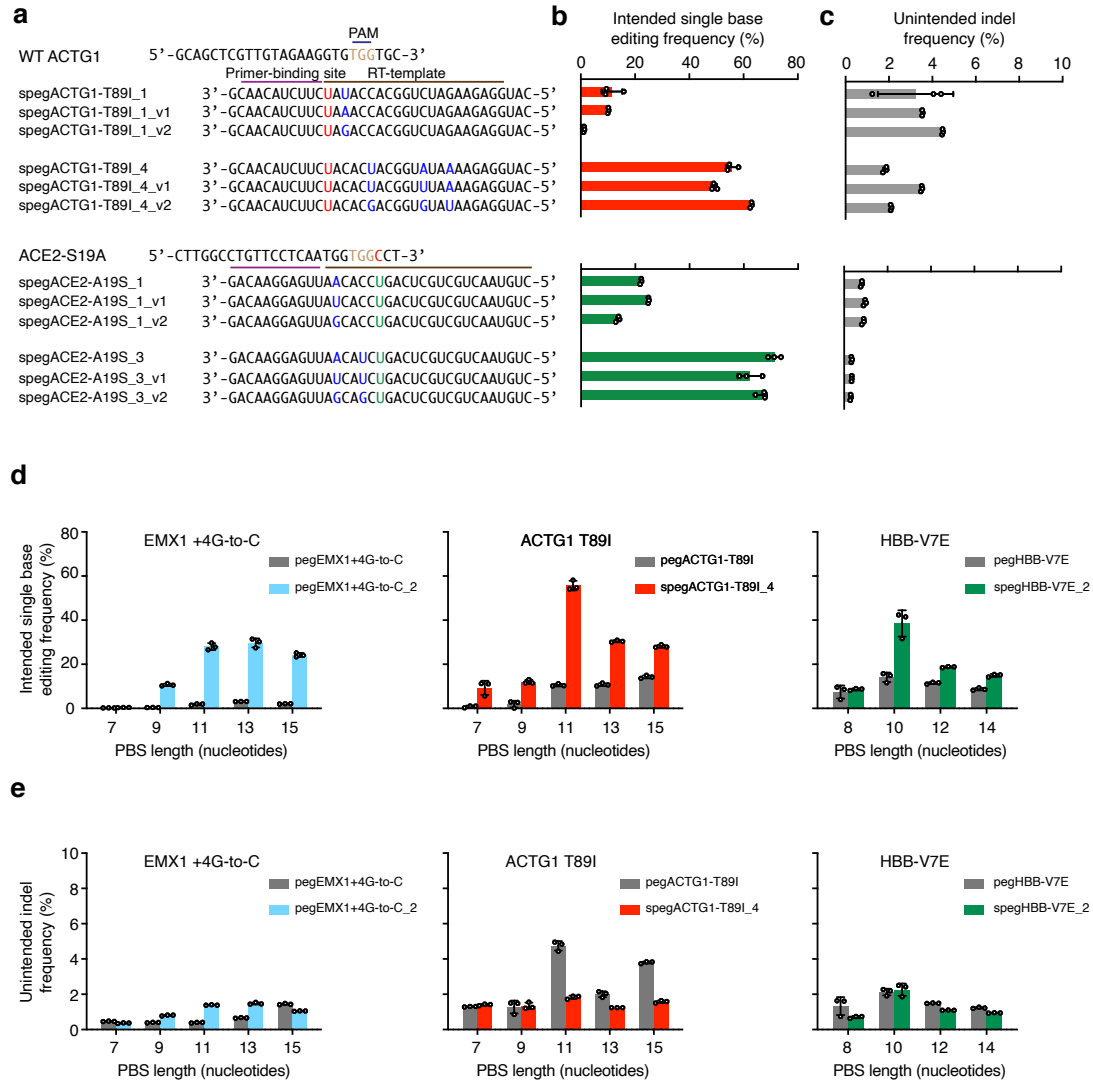

**Supplementary Fig. 9. Effects of the mutation type and PBS length of spegRNA on editing efficiency.**

(a) Sequences of PBS and RTT of the spegRNAs with different kind of SSMs (*e.g.*, transition and transversion). Pathogenic point mutations are in red and SSMs are in blue. (b, c) The intended single-base editing frequencies (b) and unintended indel frequencies (c) were induced by the spegRNAs in (a). (d, e) The intended single-base editing frequencies (d) and unintended indel frequencies (e) induced by the spegRNAs with different length of PBS at the indicated target sites. (b, c, d, e) Means



$\pm$  s.d. are from three independent experiments. Source data are provided as a Source Data file.

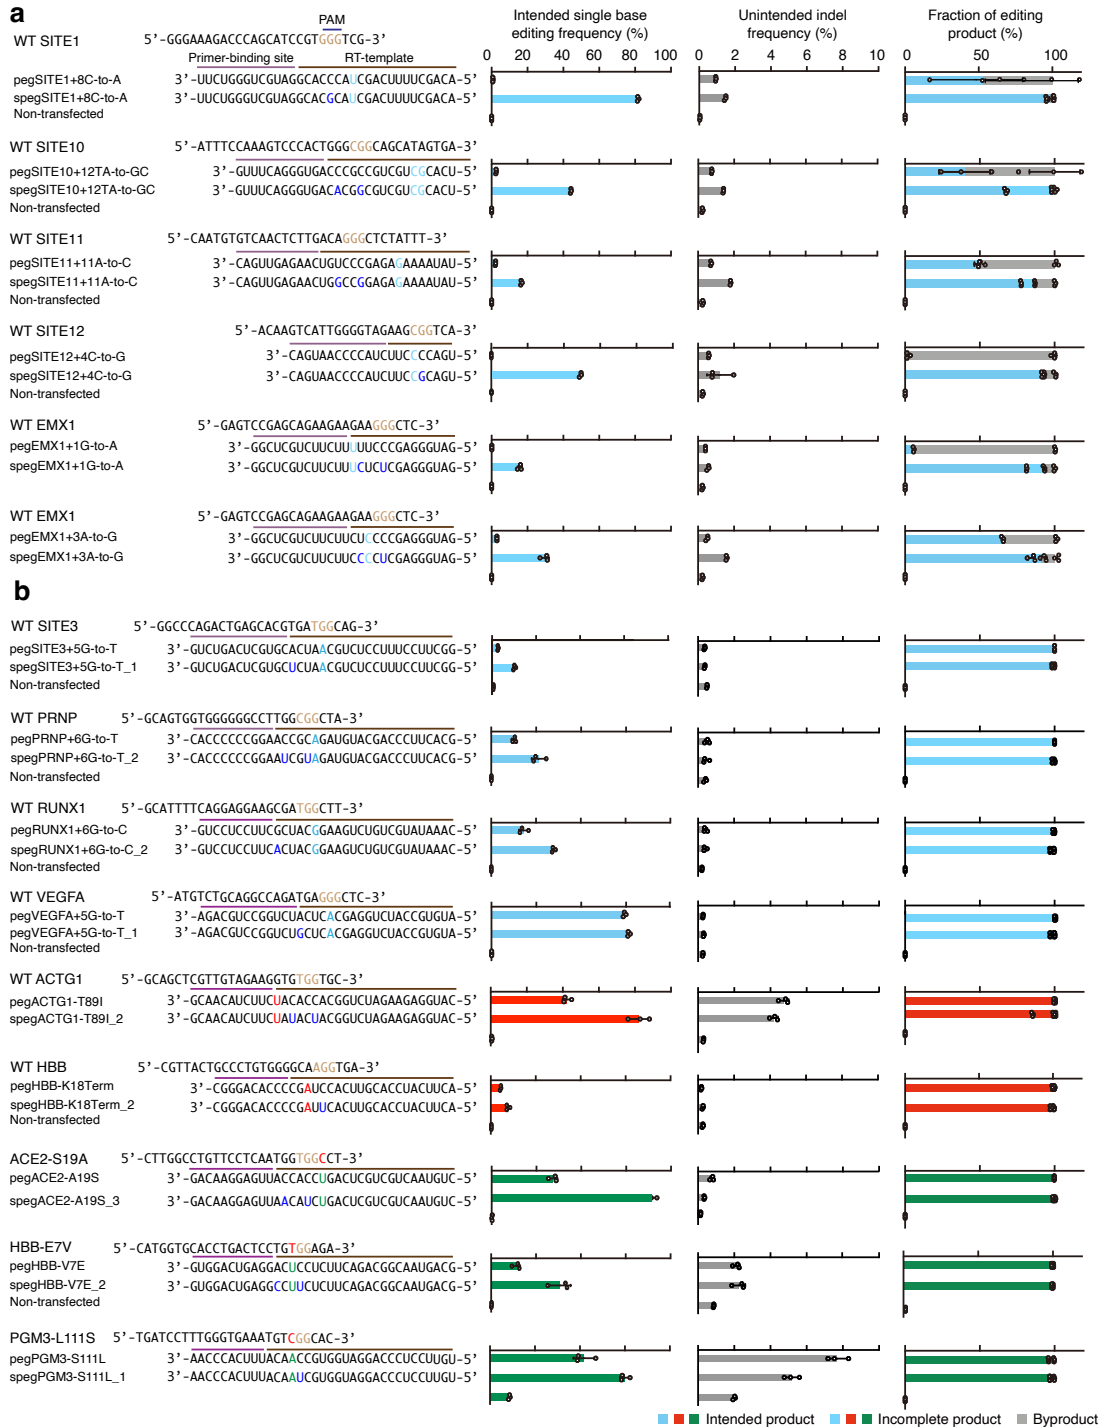

**Supplementary Fig. 10. Comparison of the editing efficiencies by pegRNA and spegRNA at more target sites.**

(a) The intended single-base editing frequencies, unintended indel frequencies and fractions of editing product were induced by the indicated pegRNAs and spegRNAs

at newly tested target sites. **(b)** Reanalyzing the intended single-base editing frequencies, unintended indel frequencies and fractions of editing product that were induced by the indicated pegRNAs and spegRNAs at previously tested target sites. Means  $\pm$  s.d. are from three independent experiments. The data are from Fig. **1a** and Supplementary Fig. **1** and **2. (a, b)**. Source data are provided as a Source Data file.

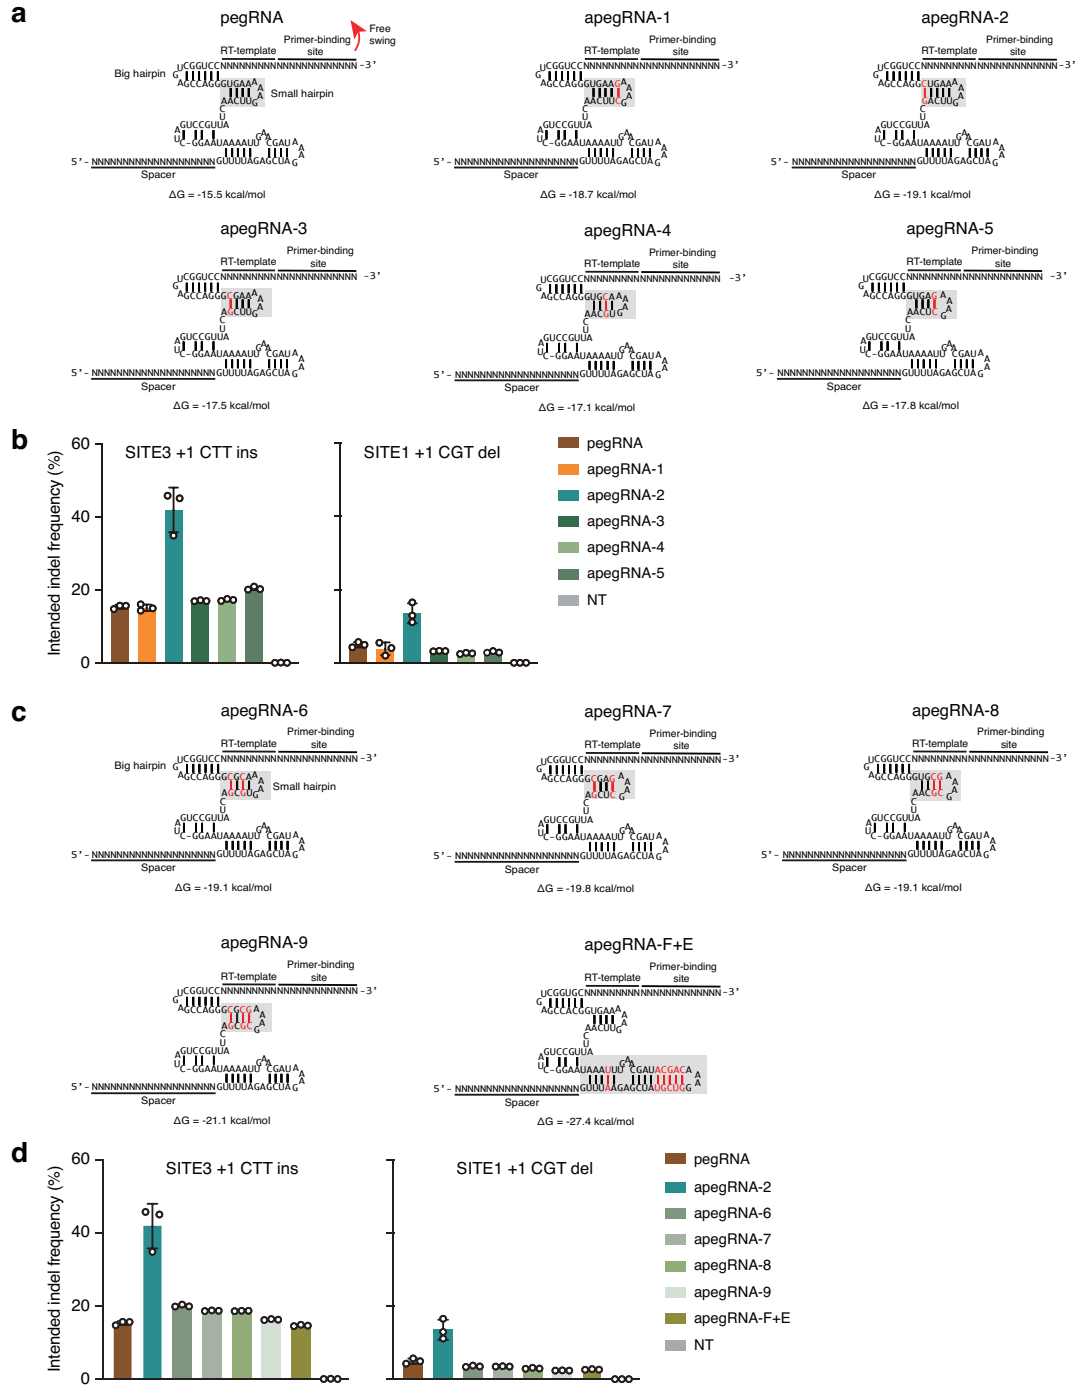

**Supplementary Fig. 11. Effect of pegRNA scaffold structure on editing efficiency.**

(a) Schematic diagrams illustrating the predicted secondary structures of a regular pegRNA and the apegRNAs with one A/U-to-G/C base pair change in the small hairpin. (b) Intended indel frequencies were induced by the pegRNAs in (a) under the

PE3 setting. **(c)** Schematic diagrams illustrating the predicted secondary structures of the apegRNAs with two A/U-to-G/C base pair change in the small hairpin or with a previously published structure<sup>17</sup>. **(d)** Intended indel frequencies were induced by apegRNA-2 and the pegRNAs in **(c)** under the PE3 setting. **(b, d)** Means  $\pm$  s.d. are from three independent experiments. Source data are provided as a Source Data file.

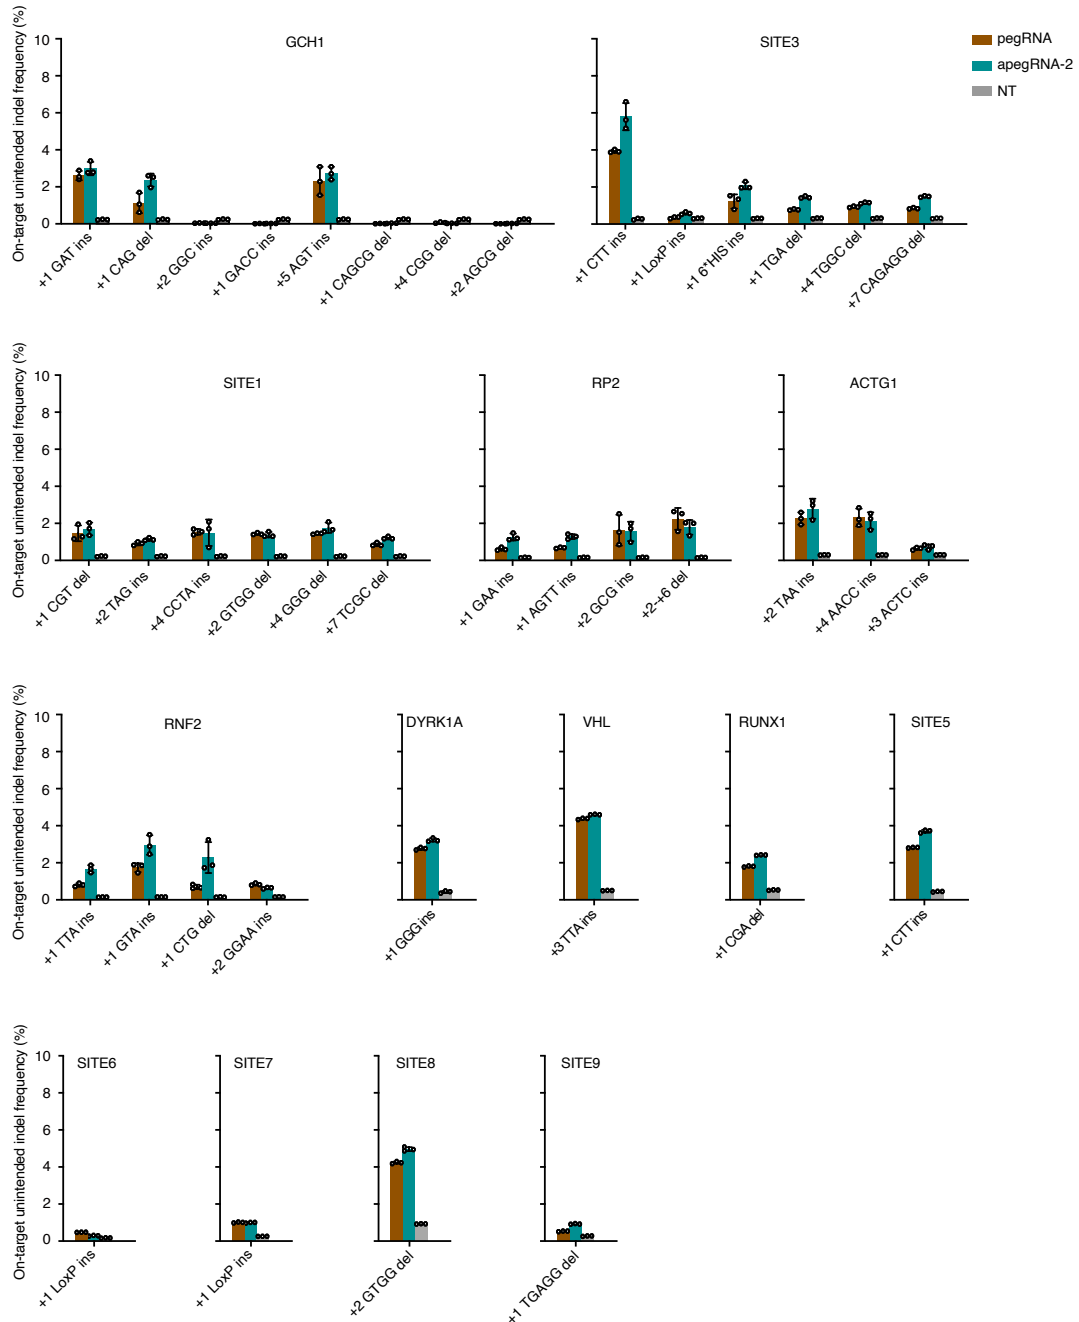

**Supplementary Fig. 12. Unintended indels induced by regular pegRNA and apegRNA-2 at on-target sites.**

On-target unintended indel frequencies induced by the regular pegRNA and apegRNA-2 at the indicated sites under PE3 setting. Means  $\pm$  s.d. are from three independent experiments. Source data are provided as a Source Data file.

|                         |                                                                                                                                                                                        |                                |           |
|-------------------------|----------------------------------------------------------------------------------------------------------------------------------------------------------------------------------------|--------------------------------|-----------|
| GCH1 (+1 GAT ins)       |                                                                                                                                                                                        | RT template scaffold insertion |           |
| WT                      | GGCCGAGAACC---CAGCCGCAAGGGCTGCTCAAGA                                                                                                                                                   | pegRNA                         | apegRNA-2 |
| Complete product        | GGCCGAGAACC <b>CAT</b> CAGCCGCAAGGGCTGCTCAAGA                                                                                                                                          | 29.72%                         | 32.53%    |
| Byproducts              | GGCCGAGAACC <b>CA</b> T <b>CAGCCGCAAGGGCTGCTCAAGA</b> 0.2800% 0.2470%<br>GGCCGAGAACC <b>CC</b> <b>AT</b> CAGCCGCAAGGGCT <b>GA</b> AAAGA 0 0.0170%                                      |                                |           |
| GCH1 (+1 CAG del)       |                                                                                                                                                                                        |                                |           |
| WT                      | GGCCGAGAACC <b>AG</b> CGCAAGGGCTGCTCAAGA                                                                                                                                               | pegRNA                         | apegRNA-2 |
| Complete product        | GGCCGAGAACC <b>CC</b> CGCAAGGGCTGCTCAAGA                                                                                                                                               | 3.16%                          | 16.80%    |
| Byproducts              | GGCCGAGAACC <b>CC</b> CGCAAGGGCT <b>GC</b> TCAAGA 0.1070% 0.0200%                                                                                                                      |                                |           |
| GCH1 (+2 GGC ins)       |                                                                                                                                                                                        |                                |           |
| WT                      | GGCCGAGAACC <b>CC</b> CGCAAGGGCTGCTCAAGCCCT                                                                                                                                            | pegRNA                         | apegRNA-2 |
| Complete product        | GGCCGAGAACC <b>CCCG</b> CGCAAGGGCTGCTCAAGCCCT                                                                                                                                          | 17.65%                         | 29.32%    |
| Byproducts              | GGCCGAGAACC <b>CCCGG</b> CGCAAGGGCTGCTCAAGCCCT 0.2600% 0.0959%                                                                                                                         |                                |           |
| GCH1 (+1 GACC ins)      |                                                                                                                                                                                        |                                |           |
| WT                      | GGCCGAGAACC <b>CC</b> CGCAAGGGCTGCTCAAGCCCT                                                                                                                                            | pegRNA                         | apegRNA-2 |
| Complete product        | GGCCGAGAACC <b>CCCGAC</b> CGCAAGGGCTGCTCAAGCCCT                                                                                                                                        | 10.73%                         | 27.87%    |
| Byproducts              | GGCCGAGAACC <b>CCCGACG</b> CGCAAGGGCTGCTCAAGCCCT 0.0253% 0.0968%                                                                                                                       |                                |           |
| GCH1 (+5 GAT ins)       |                                                                                                                                                                                        |                                |           |
| WT                      | GGCCGAGAACC <b>CC</b> CGCAAGGGCTGCTCAAGCCCT                                                                                                                                            | pegRNA                         | apegRNA-2 |
| Complete product        | GGCCGAGAACC <b>CCCGACG</b> CGCAAGGGCTGCTCAAGCCCT                                                                                                                                       | 3.11%                          | 8.12%     |
| Byproducts              | GGCCGAGAACC <b>CCCGACG</b> CGCAAGGGCTGCTCAAGCCCT 0 0.0724%                                                                                                                             |                                |           |
| GCH1 (+1 CAGCG del)     |                                                                                                                                                                                        |                                |           |
| WT                      | GGCCGAGAACC <b>CC</b> CGCAAGGGCTGCTCAAGCCCT                                                                                                                                            | pegRNA                         | apegRNA-2 |
| Complete product        | GGCCGAGAACC <b>CCCG</b> CGCAAGGGCTGCTCAAGCCCT                                                                                                                                          | 8.65%                          | 21.11%    |
| Byproducts              | GGCCGAGAACC <b>CCCG</b> CGCAAGGGCTGCTCAAGCCCT 0.4615% 0.7205%                                                                                                                          |                                |           |
| GCH1 (+4 CGG del)       |                                                                                                                                                                                        |                                |           |
| WT                      | GGCCGAGAACC <b>CC</b> CGCAAGGGCTGCTCAAGCCCT                                                                                                                                            | pegRNA                         | apegRNA-2 |
| Complete product        | GGCCGAGAACC <b>CCCG</b> CGCAAGGGCTGCTCAAGCCCT                                                                                                                                          | 7.33%                          | 29.77%    |
| Byproducts              | GGCCGAGAACC <b>CCCGG</b> CGCAAGGGCTGCTCAAGCCCT 0.0329% 0.0802%<br>GGCCGAGAACC <b>CCCG</b> CGCAAGGGCTGCTCAAGCCCT 0 0.0094%                                                              |                                |           |
| GCH1 (+2 AGCG del)      |                                                                                                                                                                                        |                                |           |
| WT                      | GGCCGAGAACC <b>CC</b> CGCAAGGGCTGCTCAAGCCCT                                                                                                                                            | pegRNA                         | apegRNA-2 |
| Complete product        | GGCCGAGAACC <b>CCCG</b> CGCAAGGGCTGCTCAAGCCCT                                                                                                                                          | 9.07%                          | 26.36%    |
| Byproducts              | GGCCGAGAACC <b>CCCGG</b> CGCAAGGGCTGCTCAAGCCCT 0.0171% 0.2711%                                                                                                                         |                                |           |
| SITE1 (+2 TAG ins)      |                                                                                                                                                                                        |                                |           |
| WT                      | AAGACCAGC <b>ATCC</b> ---GTGGCTGCTGAAAAGCTGGGAAATCGGCT                                                                                                                                 | pegRNA                         | apegRNA-2 |
| Complete product        | AAGACCAGC <b>ATCCG</b> AGTGGCTGCTGAAAAGCTGGGAAATCGGCT                                                                                                                                  | 1.07%                          | 6.23%     |
| Byproducts              | AAGACCAGC <b>ATCC</b> AGTGGCTGCTGAAAAGCTGGGAAATCGGCT 0 0.0037%<br>AAGACCAGC <b>ATCC</b> AGTGGCTGCTGAAAAGCTGGGAAATCGGCT 0.0069% 0                                                       |                                |           |
| SITE1 (+2 GTGG del)     |                                                                                                                                                                                        |                                |           |
| WT                      | AAGACCAGC <b>ATCC</b> GTGGCTGCTGAAAAGCTGGGAAATCGGCT                                                                                                                                    | pegRNA                         | apegRNA-2 |
| Complete product        | AAGACCAGC <b>ATCC</b> GTGGCTGCTGAAAAGCTGGGAAATCGGCT                                                                                                                                    | 20.1%                          | 18.49%    |
| Byproducts              | AAGACCAGC <b>ATCC</b> GTGGCTGCTGAAAAGCTGGGAAATCGGCT 0.0140% 0.0078%                                                                                                                    |                                |           |
| SITE1 (+4 GGG del)      |                                                                                                                                                                                        |                                |           |
| WT                      | AAGACCAGC <b>ATCC</b> GTGGCTGCTGAAAAGCTGGGAAATCGGCT                                                                                                                                    | pegRNA                         | apegRNA-2 |
| Complete product        | AAGACCAGC <b>ATCCG</b> GTGGCTGCTGAAAAGCTGGGAAATCGGCT                                                                                                                                   | 15.55%                         | 22.59%    |
| Byproducts              | AAGACCAGC <b>ATCCG</b> GTGGCTGCTGAAAAGCTGGGAAATCGGCT 0.0022% 0.0160%                                                                                                                   |                                |           |
| SITE1 (+7 TCGC del)     |                                                                                                                                                                                        |                                |           |
| WT                      | AAGACCAGC <b>ATCC</b> GTGGCTGCTGAAAAGCTGGGAAATCGGCT                                                                                                                                    | pegRNA                         | apegRNA-2 |
| Complete product        | AAGACCAGC <b>ATCCG</b> GTGGCTGCTGAAAAGCTGGGAAATCGGCT                                                                                                                                   | 2.29%                          | 12.41%    |
| Byproducts              | AAGACCAGC <b>ATCCG</b> GTGGCTGCTGAAAAGCTGGGAAATCGGCT 0.0040% 0.0114%                                                                                                                   |                                |           |
| SITE3 (+1 TGA del)      |                                                                                                                                                                                        |                                |           |
| WT                      | CAGACTGAGC <b>ACTGA</b> TGCAGAGGAAGAACCTCTCTCCAGAGGGCT                                                                                                                                 | pegRNA                         | apegRNA-2 |
| Complete product        | CAGACTGAGC <b>ACTGA</b> TGCAGAGGAAGAACCTCTCTCCAGAGGGCT                                                                                                                                 | 9.17%                          | 26.58%    |
| Byproducts              | CAGACTGAGC <b>ACTGA</b> TGCAGAGGAAGAACCTCTCTCCAGAGGGCT 0.0140% 0.0167%                                                                                                                 |                                |           |
| SITE3 (+4 TGGC del)     |                                                                                                                                                                                        |                                |           |
| WT                      | CAGACTGAGC <b>ACTGA</b> TGCAGAGGAAGAACCTCTCTCCAGAGGGCT                                                                                                                                 | pegRNA                         | apegRNA-2 |
| Complete product        | CAGACTGAGC <b>ACTGA</b> TGCAGAGGAAGAACCTCTCTCCAGAGGGCT                                                                                                                                 | 8.89%                          | 22.85%    |
| Byproducts              | CAGACTGAGC <b>ACTGA</b> TGCAGAGGAAGAACCTCTCTCCAGAGGGCT 0.0032% 0.0567%                                                                                                                 |                                |           |
| SITE3 (+7 CAGAGG del)   |                                                                                                                                                                                        |                                |           |
| WT                      | CAGACTGAGC <b>ACTGA</b> TGCAGAGGAAGAACCTCTCTCCAGAGGGCT                                                                                                                                 | pegRNA                         | apegRNA-2 |
| Complete product        | CAGACTGAGC <b>ACTGA</b> TGCAGAGGAAGAACCTCTCTCCAGAGGGCT                                                                                                                                 | 8.11%                          | 22.85%    |
| Byproducts              | CAGACTGAGC <b>ACTGA</b> TGCAGAGGAAGAACCTCTCTCCAGAGGGCT 0.0133% 0.0262%                                                                                                                 |                                |           |
| SITE3 (+1 6'HIS ins)    |                                                                                                                                                                                        |                                |           |
| WT                      | CAGACTGAGC <b>ACTGA</b> TGCAGAGGAAGAACCTCTCTCCAGAGGGCT                                                                                                                                 | pegRNA                         | apegRNA-2 |
| Complete product        | CAGACTGAGC <b>ACTGA</b> TGCAGAGGAAGAACCTCTCTCCAGAGGGCT                                                                                                                                 | 12.50%                         | 25.11%    |
| Byproducts              | CAGACTGAGC <b>ACTGA</b> TGCAGAGGAAGAACCTCTCTCCAGAGGGCT 0.0200% 0.0001%                                                                                                                 |                                |           |
| SITE3 (+1 LoxP ins)     |                                                                                                                                                                                        |                                |           |
| WT                      | CAGACTGAGC <b>ACTGA</b> TGCAGAGGAAGAACCTCTCTCCAGAGGGCT                                                                                                                                 | pegRNA                         | apegRNA-2 |
| Complete product        | CAGACTGAGC <b>ACTGA</b> TGCAGAGGAAGAACCTCTCTCCAGAGGGCT                                                                                                                                 | 3.25%                          | 15.69%    |
| Byproducts              | CAGACTGAGC <b>ACTGA</b> TGCAGAGGAAGAACCTCTCTCCAGAGGGCT 0 0.0100%                                                                                                                       |                                |           |
| RP2 (+1 GAA ins)        |                                                                                                                                                                                        |                                |           |
| WT                      | ACAGCTTTGAGCT---CTCGTAGTAGGTATAGGAACAT                                                                                                                                                 | pegRNA                         | apegRNA-2 |
| Complete product        | ACAGCTTTGAGCT <b>GA</b> CTCGTAGTAGGTATAGGAACAT                                                                                                                                         | 5.25%                          | 13.74%    |
| Byproducts              | ACAGCTTTGAGCT <b>GA</b> CTCGTAGTAGGTATAGGAACAT 0.2970% 0.6030%                                                                                                                         |                                |           |
| RP2 (+1 AGTT ins)       |                                                                                                                                                                                        |                                |           |
| WT                      | ACAGCTTTGAGCT---CTCGTAGTAGGTATAGGAACAT                                                                                                                                                 | pegRNA                         | apegRNA-2 |
| Complete product        | ACAGCTTTGAGCT <b>AGTT</b> CTCGTAGTAGGTATAGGAACAT                                                                                                                                       | 5.75%                          | 11.54%    |
| Byproducts              | ACAGCTTTGAGCT <b>AGTT</b> CTCGTAGTAGGTATAGGAACAT 0.3430% 1.0500%                                                                                                                       |                                |           |
| RP2 (+2 GCG ins)        |                                                                                                                                                                                        |                                |           |
| WT                      | ACAGCTTTGAGCT---CTCGTAGTAGGTATAGGAACAT                                                                                                                                                 | pegRNA                         | apegRNA-2 |
| Complete product        | ACAGCTTTGAGCT <b>CGG</b> CTCGTAGTAGGTATAGGAACAT                                                                                                                                        | 2.60%                          | 5.84%     |
| Byproducts              | ACAGCTTTGAGCT <b>CGG</b> CTCGTAGTAGGTATAGGAACAT 0.0005% 0.0009%                                                                                                                        |                                |           |
| RP2 (+2 TTCGG del)      |                                                                                                                                                                                        |                                |           |
| WT                      | ACAGCTTTGAGCTCTCGTAGTAGGTATAGGAACAT                                                                                                                                                    | pegRNA                         | apegRNA-2 |
| Complete product        | ACAGCTTTGAGCTCTCGTAGTAGGTATAGGAACAT                                                                                                                                                    | 0.29%                          | 1.67%     |
| Byproducts              | ACAGCTTTGAGCTCTCGTAGTAGGTATAGGAACAT 0.0009% 0.0003%                                                                                                                                    |                                |           |
| ACTG1 (+2 TAA ins)      |                                                                                                                                                                                        |                                |           |
| WT                      | CTCGTTGAGAAGG---TGGCGCCAGACTTCTCCATGCTGCC                                                                                                                                              | pegRNA                         | apegRNA-2 |
| Complete product        | CTCGTTGAGAAGG <b>TA</b> TGGCGCCAGACTTCTCCATGCTGCC                                                                                                                                      | 7.62%                          | 14.18%    |
| Byproducts              | CTCGTTGAGAAGG <b>TA</b> TGGCGCCAGACTTCTCCATGCTGCC 0.0170% 0.0130%                                                                                                                      |                                |           |
| ACTG1 (+4 AAC ins)      |                                                                                                                                                                                        |                                |           |
| WT                      | CTCGTTGAGAAGG---TGGCGCCAGACTTCTCCATGCTGCC                                                                                                                                              | pegRNA                         | apegRNA-2 |
| Complete product        | CTCGTTGAGAAGG <b>GA</b> CTGGCGCCAGACTTCTCCATGCTGCC                                                                                                                                     | 6.84%                          | 12.59%    |
| Byproducts              | CTCGTTGAGAAGG <b>GA</b> CTGGCGCCAGACTTCTCCATGCTGCC 0.0030% 0.0100%                                                                                                                     |                                |           |
| ACTG1 (+3 ACTC ins)     |                                                                                                                                                                                        |                                |           |
| WT                      | CTCGTTGAGAAGG---TGGCGCCAGACTTCTCCATGCTGCC                                                                                                                                              | pegRNA                         | apegRNA-2 |
| Complete product        | CTCGTTGAGAAGG <b>ACTC</b> TGGCGCCAGACTTCTCCATGCTGCC                                                                                                                                    | 3.68%                          | 4.32%     |
| Byproducts              | CTCGTTGAGAAGG <b>ACTC</b> TGGCGCCAGACTTCTCCATGCTGCC 0.0020% 0.0025%<br>CTCGTTGAGAAGG <b>ACTC</b> TGGCGCCAGACTTCTCCATGCTGCC 0 0                                                         |                                |           |
| RNF2 (+1 TTA ins)       |                                                                                                                                                                                        |                                |           |
| WT                      | TCTTAGTCATTAC---CTGAGGTTGTTGTTAACTCATATA                                                                                                                                               | pegRNA                         | apegRNA-2 |
| Complete product        | TCTTAGTCATTAC <b>TA</b> CTGAGGTTGTTGTTAACTCATATA                                                                                                                                       | 9.50%                          | 24.23%    |
| Byproducts              | TCTTAGTCATTAC <b>TA</b> CTGAGGTTGTTGTTAACTCATATA 0.0470% 0.0300%<br>TCTTAGTCATTAC <b>TA</b> CTGAGGTTGTTGTTAACTCATATA 0 0.0300%                                                         |                                |           |
| RNF2 (+1 GTA ins)       |                                                                                                                                                                                        |                                |           |
| WT                      | TCTTAGTCATTAC---CTGAGGTTGTTGTTAACTCATATA                                                                                                                                               | pegRNA                         | apegRNA-2 |
| Complete product        | TCTTAGTCATTAC <b>TA</b> CTGAGGTTGTTGTTAACTCATATA                                                                                                                                       | 16.46%                         | 24.23%    |
| Byproducts              | TCTTAGTCATTAC <b>TA</b> CTGAGGTTGTTGTTAACTCATATA 0.4824% 0.1965%                                                                                                                       |                                |           |
| RNF2 (+1 CTD del)       |                                                                                                                                                                                        |                                |           |
| WT                      | TCTTAGTCATTAC <b>TA</b> CTGAGGTTGTTGTTAACTCATATA                                                                                                                                       | pegRNA                         | apegRNA-2 |
| Complete product        | TCTTAGTCATTAC---AGGTTGTTGTTAACTCATATA                                                                                                                                                  | 6.01%                          | 19.48%    |
| Byproducts              | TCTTAGTCATTAC---AGGTTGTTGTTAACTCATATA 0.0900% 0.2470%<br>TCTTAGTCATTAC---AGGTTGTTGTTAACTCATATA 0 0                                                                                     |                                |           |
| RNF2 (+2 GGAA ins)      |                                                                                                                                                                                        |                                |           |
| WT                      | TCTTAGTCATTAC---TGAGGTTGTTGTTAACTCATATA                                                                                                                                                | pegRNA                         | apegRNA-2 |
| Complete product        | TCTTAGTCATTAC <b>GA</b> AGGTTGTTGTTAACTCATATA                                                                                                                                          | 8.99%                          | 7.99%     |
| Byproducts              | TCTTAGTCATTAC <b>GA</b> AGGTTGTTGTTAACTCATATA 0.0778% 0.0550%<br>TCTTAGTCATTAC <b>GA</b> AGGTTGTTGTTAACTCATATA 0.0718% 0                                                               |                                |           |
| VHL (+3 TTA ins)        |                                                                                                                                                                                        |                                |           |
| WT                      | GAGGGAATCCCGG---AGGCGGAGAACTGGACGAG                                                                                                                                                    | pegRNA                         | apegRNA-2 |
| Complete product        | GAGGGAATCCCGG <b>TA</b> AGGCGGAGAACTGGACGAG                                                                                                                                            | 21.71%                         | 30.82%    |
| Byproducts              | GAGGGAATCCCGG <b>TA</b> AGGCGGAGAACTGGACGAG 0.0484% 0.1098%                                                                                                                            |                                |           |
| RUNX1 (+1 CGA del)      |                                                                                                                                                                                        |                                |           |
| WT                      | TTTCAGGAGGAAG <b>CGA</b> TGCTCAGACAGCATATT                                                                                                                                             | pegRNA                         | apegRNA-2 |
| Complete product        | TTTCAGGAGGAAG---TGCCTCAGACAGCATATT                                                                                                                                                     | 11.60%                         | 16.04%    |
| Byproducts              | TTTCAGGAGGAAG---TGCCTCAGACAGCATATT 0.0368% 0.1635%                                                                                                                                     |                                |           |
| SITES (+1 CTT ins)      |                                                                                                                                                                                        |                                |           |
| WT                      | CAGACTGAGCAGC---TGCAGAGCCAGAAATGCAGAG                                                                                                                                                  | pegRNA                         | apegRNA-2 |
| Complete product        | CAGACTGAGCAGC <b>CTT</b> TGCAGAGCCAGAAATGCAGAG                                                                                                                                         | 16.61%                         | 23.66%    |
| Byproducts              | CAGACTGAGCAGC <b>CTT</b> TGCAGAGCCAGAAATGCAGAG 0.0532% 0.0957%<br>CAGACTGAGCAGC <b>CTT</b> TGCAGAGCCAGAAATGCAGAG 0 0.0188%<br>CAGACTGAGCAGC <b>CTT</b> TGCAGAGCCAGAAATGCAGAG 0 0.0043% |                                |           |
| SITE8 (+2 GTGG del)     |                                                                                                                                                                                        |                                |           |
| WT                      | CAGACTGAGCAGC <b>CTT</b> TGCAGAGCCAGAAATGCAGAG                                                                                                                                         | pegRNA                         | apegRNA-2 |
| Complete product        | CAGACTGAGCAGC <b>CTT</b> TGCAGAGCCAGAAATGCAGAG                                                                                                                                         | 11.14%                         | 14.38%    |
| Byproducts              | CAGACTGAGCAGC <b>CTT</b> TGCAGAGCCAGAAATGCAGAG 0.26% 0.3854%<br>CAGACTGAGCAGC <b>CTT</b> TGCAGAGCCAGAAATGCAGAG 0.0131% 0.0141%                                                         |                                |           |
| SITE9 (+1-+5 TGAGG del) |                                                                                                                                                                                        |                                |           |
| WT                      | CAGACTGAGCAGC <b>CTT</b> TGCAGAGCCAGAAATGCAGAG                                                                                                                                         | pegRNA                         | apegRNA-2 |
| Complete product        | CAGACTGAGCAGC---GCTCAGCCTCCATGGAG                                                                                                                                                      | 1.27%                          | 4.65%     |
| Byproducts              | CAGACTGAGCAGC---GCTCAGCCTCCATGGAG 0.0002% 0.0079%<br>CAGACTGAGCAGC---GCTCAGCCTCCATGGAG 0 0.0137%                                                                                       |                                |           |

## Supplementary Fig. 13. Byproducts induced by regular pegRNA and apegRNA-2 at on-target sites.

The frequencies of complete products and byproducts (with pegRNA scaffold incorporation) induced by the regular pegRNA and apegRNA-2 in Fig. **2b**. The frequencies are means from three biologically independent experiments.



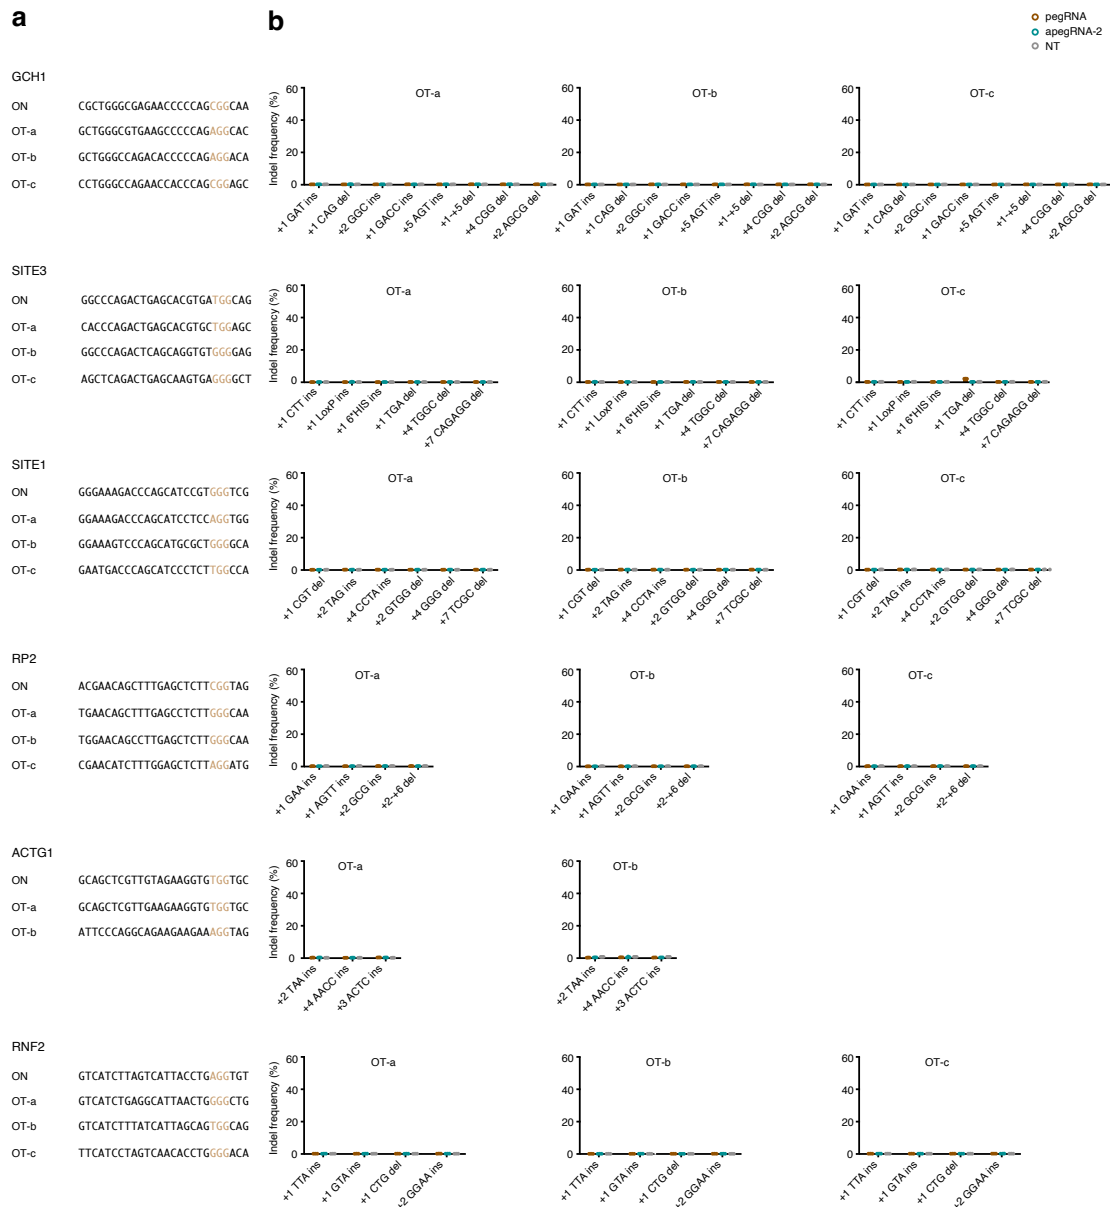

**Supplementary Fig. 14. Off-target editing induced by regular pegRNA and apegRNA-2.**

(a) The sequences of on- and off-target sites for the pegRNAs in (b). (b) The indel frequencies were determined at the predicted off-target sites. 293FT cells were either treated with the regular pegRNA, apegRNA-2 or left non-transfected (NT). Means  $\pm$

s.d. are from three independent experiments. Source data are provided as a Source Data file.

## U2OS

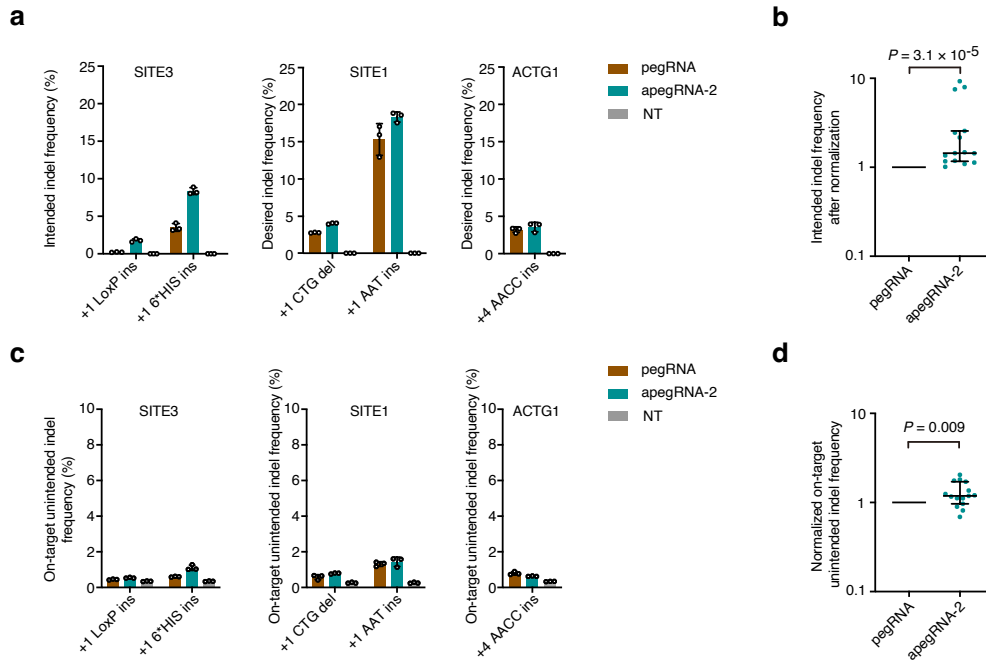

**Supplementary Fig. 15. apegRNA-2 induced higher intended indel efficiencies than regular pegRNA in U2OS cells.**

(a) On-target intended indel editing frequencies induced by the regular pegRNA and apegRNA-2 at the indicated sites in U2OS cells. (b) Statistical analysis of normalized editing frequencies, setting the frequencies induced by regular pegRNAs as 1.  $n = 15$  editing from three independent experiments shown in (a). (c) On-target unintended indel frequencies induced by the regular pegRNA and apegRNA-2 at the indicated sites in U2OS cells. (d) Statistical analysis of normalized indel frequencies, setting the frequencies induced by regular pegRNAs as 1.  $n = 15$  editing from three independent experiments shown in (c). (a, c) Means  $\pm$  s.d. are from three independent

experiments. **(b, d)**  $P$  value, Wilcoxon one-tailed signed-rank test. The median and interquartile range (IQR) are shown. Source data are provided as a Source Data file.

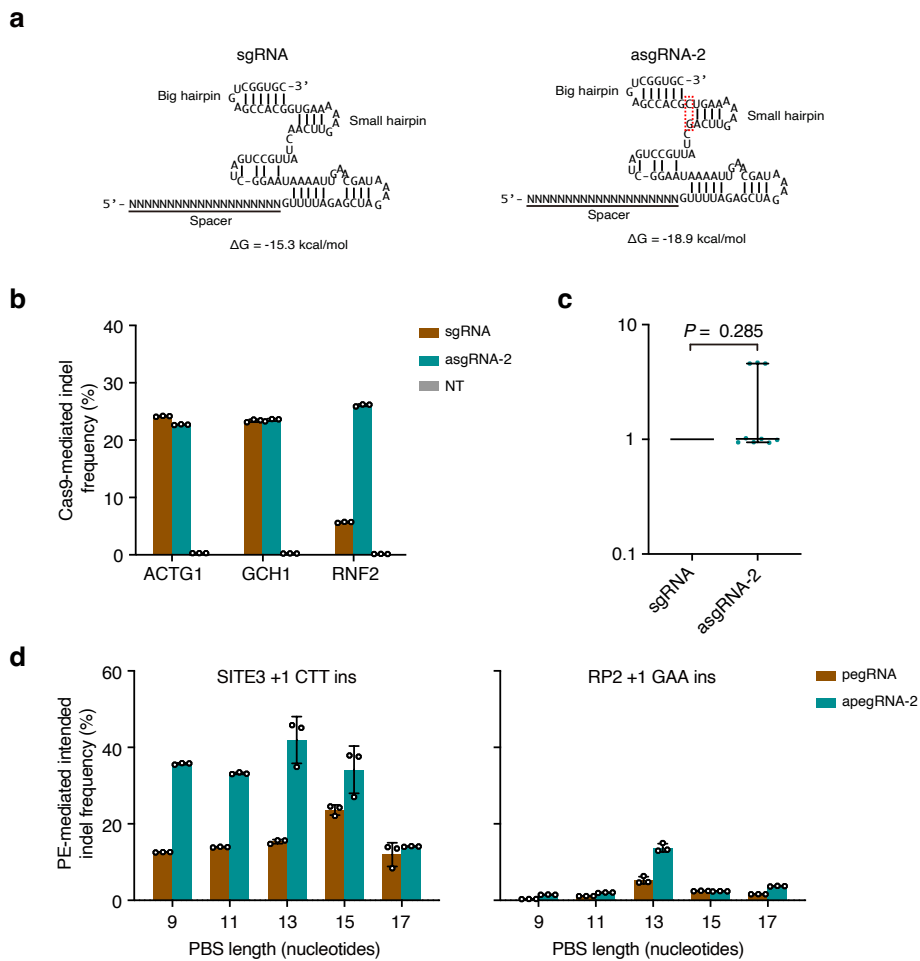

**Supplementary Fig. 16. The effect of sgRNA scaffold structure on Cas9-mediated gene editing efficiency and the effect of apegRNA-2 PBS length on PE3-mediated prime editing efficiency.**

(a) Schematic diagrams illustrating the predicted secondary structures of the regular sgRNA and asgRNA-2, which contains the same small hairpin as apegRNA-2. (b) On-target indel frequencies were induced by the co-expression of Cas9 nuclease and the regular sgRNA or asgRNA-2. (c) Statistical analysis of normalized indel frequencies, setting the frequencies induced by the regular sgRNA as 1. n = 9 editing from three independent experiments shown in (b). *P* value, Wilcoxon one-tailed

signed-rank test. The median and interquartile range (IQR) are shown. **(d)** The intended indel editing frequencies induced by the regular pegRNA and apegRNA-2 with different length of PBS at the indicated target sites. **(b, d)** Means  $\pm$  s.d. are from three independent experiments. Source data are provided as a Source Data file.

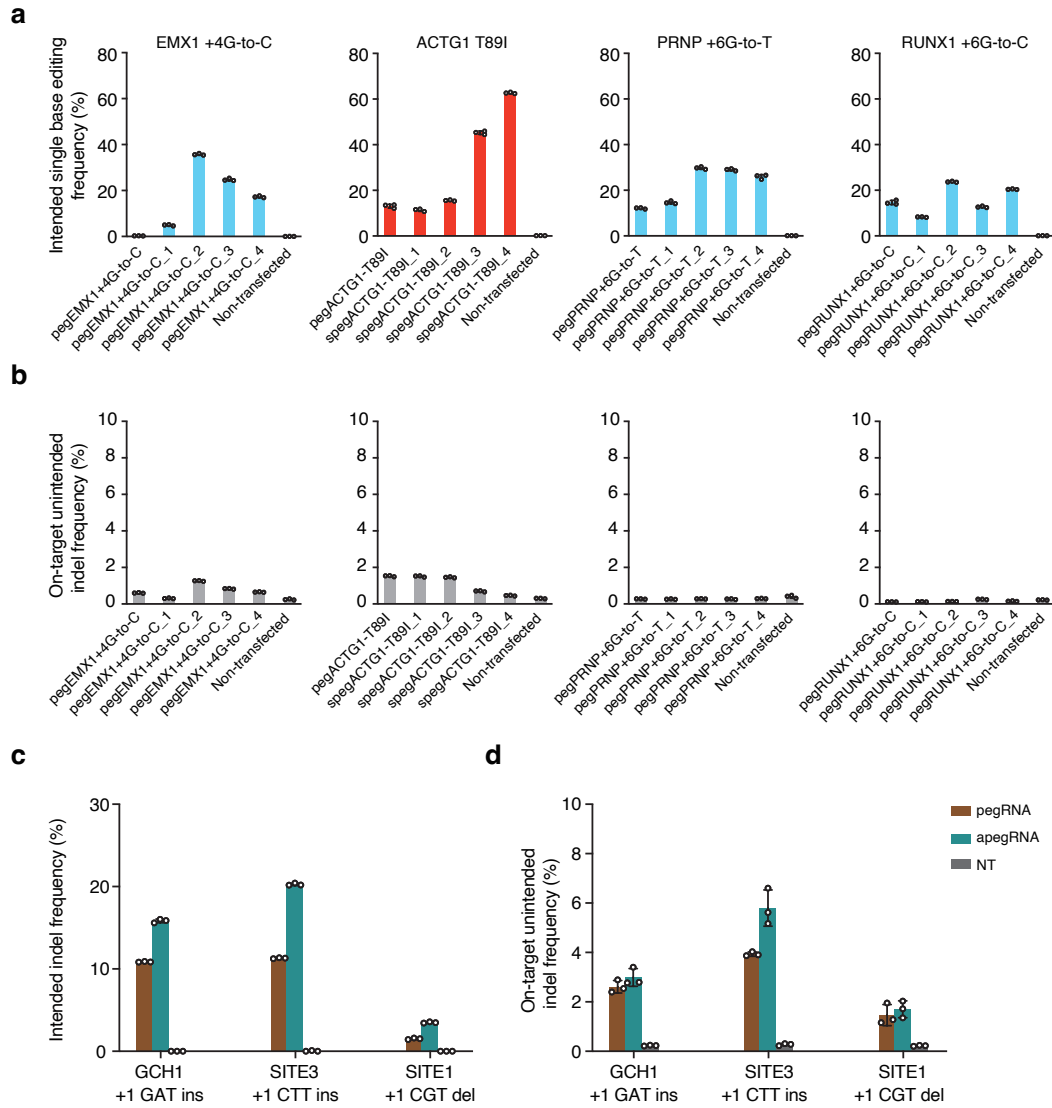

**Supplementary Fig. 17. Efficacy of spgRNA and apegRNA in PE2 system.**

(a, b) The intended single-base editing frequencies (a) and unintended indel frequencies (b) were induced by the regular pegRNA and the pegRNAs containing additional base substitutions under the PE2 setting. (c, d) Intended indel editing frequencies (c) and unintended indel frequencies (d) induced by the regular pegRNA and apegRNA at the indicated target sites under the PE2 setting. Means  $\pm$  s.d. are from three independent experiments. Source data are provided as a Source Data file.

**Uncropped gels for Supplementary Fig. 6b**

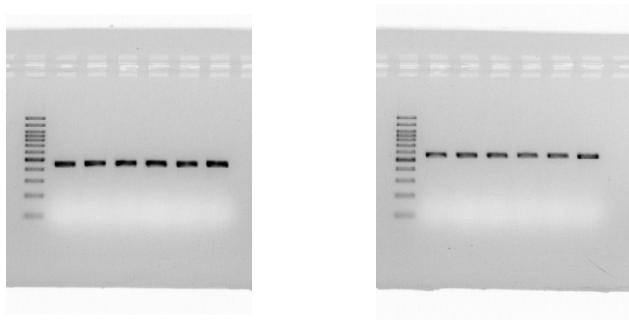

**Uncropped gels for Supplementary Fig. 6d**

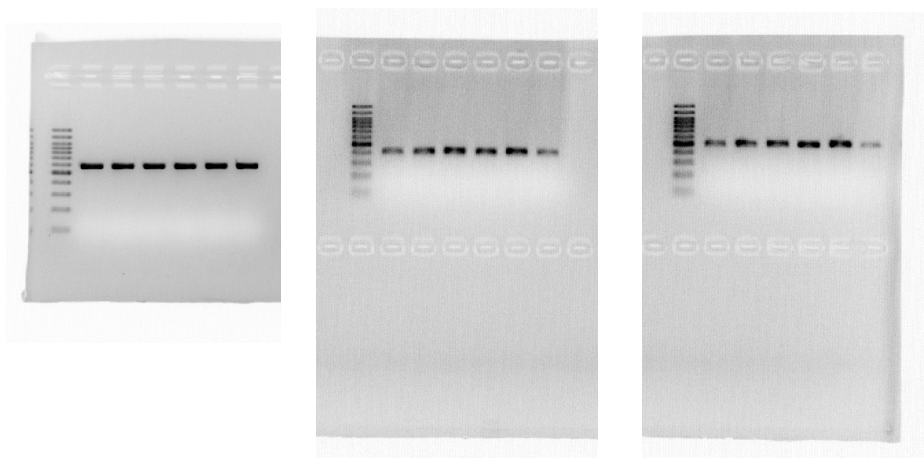

**Uncropped gels Supplementary Fig. 6.**
