# Supplementary material for: Highly efficient prime editing by introducing same-sense mutations in pegRNA or stabilizing its structure
Source: PubMed Central journal article supplement (PMC8964725; doi:10.1038/s41467-022-29339-9), 2022-03-29
Supplement: 41467_2022_29339_MOESM3_ESM.pdf [file 41467_2022_29339_MOESM3_ESM.pdf]

**Title:** Supplementary Data 1:

**Description:** Oligos used for plasmid construction.

**Title:** Supplementary Data 2:

**Description:** pegRNA target sequences and PCR primer sequences for genomic DNA amplification

**Title:** Supplementary Data 3:

**Description:** Calculation of on-target base substitutions. Base substitutions were determined by deep sequencing and base substitution frequencies at the positions in pegRNA-targeted genomic loci were calculated for indicated conditions. Read counts for all four types of bases are listed.

**Title:** Supplementary Data 4:

**Description:** Calculation of on-target indels. Indels were determined by deep sequencing and indel frequencies at the examined pegRNA-targeted genomic loci were calculated for indicated conditions. Counts of indel-containing reads and total mapped reads are listed.

**Title:** Supplementary Data 5:

**Description:** Calculation of pegRNA-dependent OT base substitutions and indels. Base substitutions and indels were determined by deep sequencing and total base substitution frequencies and indel frequencies at the examined pegRNA-dependent OT genomic loci were calculated for indicated conditions. Read counts for all four types of bases and counts of indel-containing reads and total mapped reads are listed.
